# Supplementary material for: Influence of geographic origin and tissue type on the medicinal chemical compounds of Semiliquidambar cathayensis
Source: PeerJ journal article supplement (doi:10.7717/peerj.15484), 2023-06-06

# Quantitative Analysis Complete Report

|                     |                                                                    |                      |                |
|---------------------|--------------------------------------------------------------------|----------------------|----------------|
| Batch Path          | D:\MassHunter\Data\WBR\2022\20220127-PA25\QuantResults\1.batch.bin | Analyst Name         | admin-PC\admin |
| Analysis Time       | 1/29/2022 11:06:08 AM                                              | Reporter Name        | admin          |
| Report Time         | 1/29/2022 11:08:57 AM                                              | Batch State          | Processed      |
| Last Calib Update   | 1/29/2022 11:06:07 AM                                              | Quant Report Version | B.07.01 SP1    |
| Quant Batch Version | B.07.01SP1                                                         |                      |                |

|             |                      |             |                 |
|-------------|----------------------|-------------|-----------------|
| Acq. Time   | 1/27/2022 8:35:49 PM | Data File   | BLANK1.d        |
| Sample Type | Blank                | Sample Name | BLANK           |
| Dilution    | 1                    | Acq. Method | 20220127-PA25.m |

## Sample Chromatogram

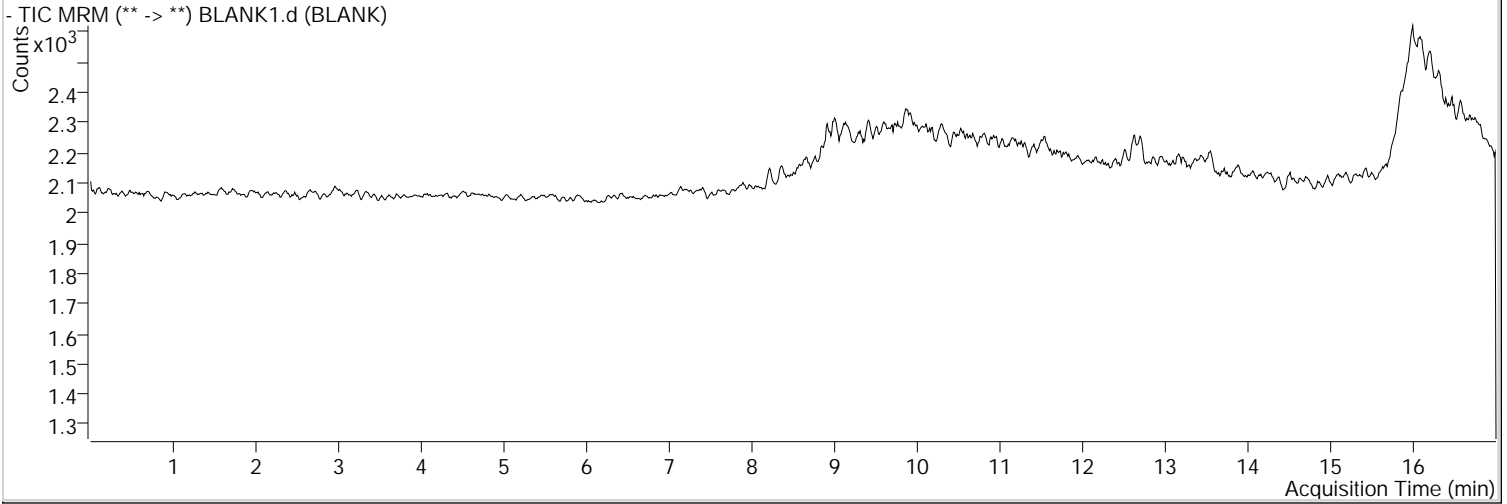

## 24-Ursolic acid

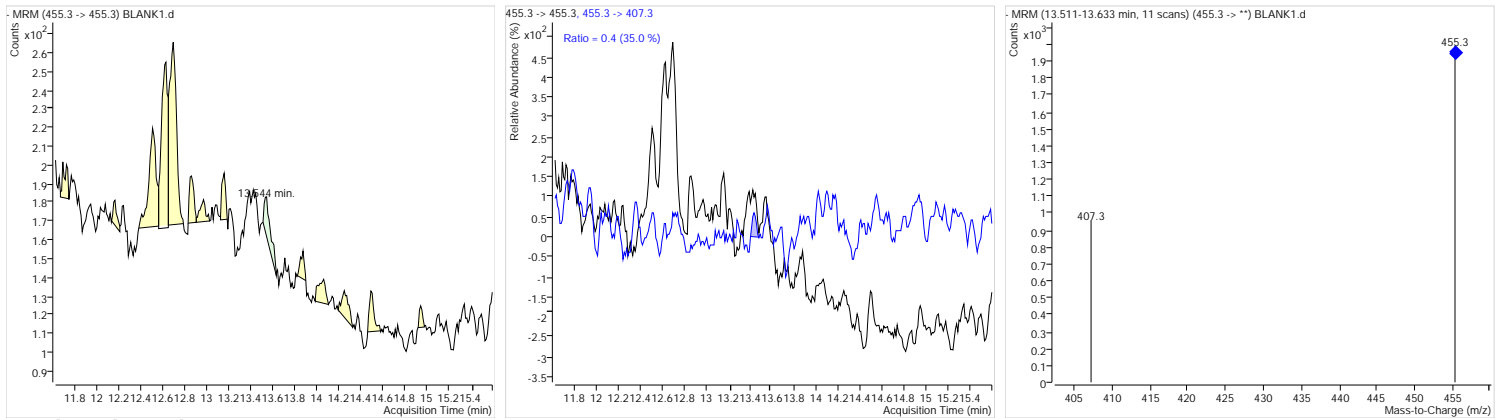

## 25-Oleanolic acid

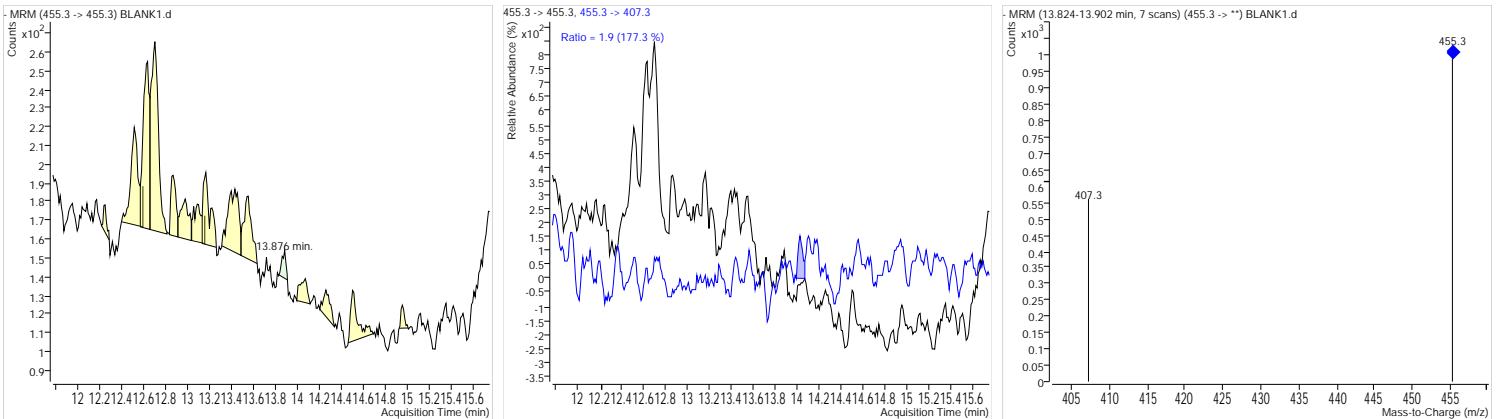

# Quantitative Analysis Complete Report

|                     |                                                                    |                      |                |
|---------------------|--------------------------------------------------------------------|----------------------|----------------|
| Batch Path          | D:\MassHunter\Data\WBR\2022\20220127-PA25\QuantResults\1.batch.bin | Analyst Name         | admin-PC\admin |
| Analysis Time       | 1/29/2022 11:06:08 AM                                              | Reporter Name        | admin          |
| Report Time         | 1/29/2022 11:09:01 AM                                              | Batch State          | Processed      |
| Last Calib Update   | 1/29/2022 11:06:07 AM                                              | Quant Report Version | B.07.01 SP1    |
| Quant Batch Version | B.07.01SP1                                                         |                      |                |

|             |                      |             |                 |
|-------------|----------------------|-------------|-----------------|
| Acq. Time   | 1/27/2022 8:53:31 PM | Data File   | STD1-r001.d     |
| Sample Type | Cal                  | Sample Name | STD1            |
| Dilution    | 1                    | Acq. Method | 20220127-PA25.m |

## Sample Chromatogram

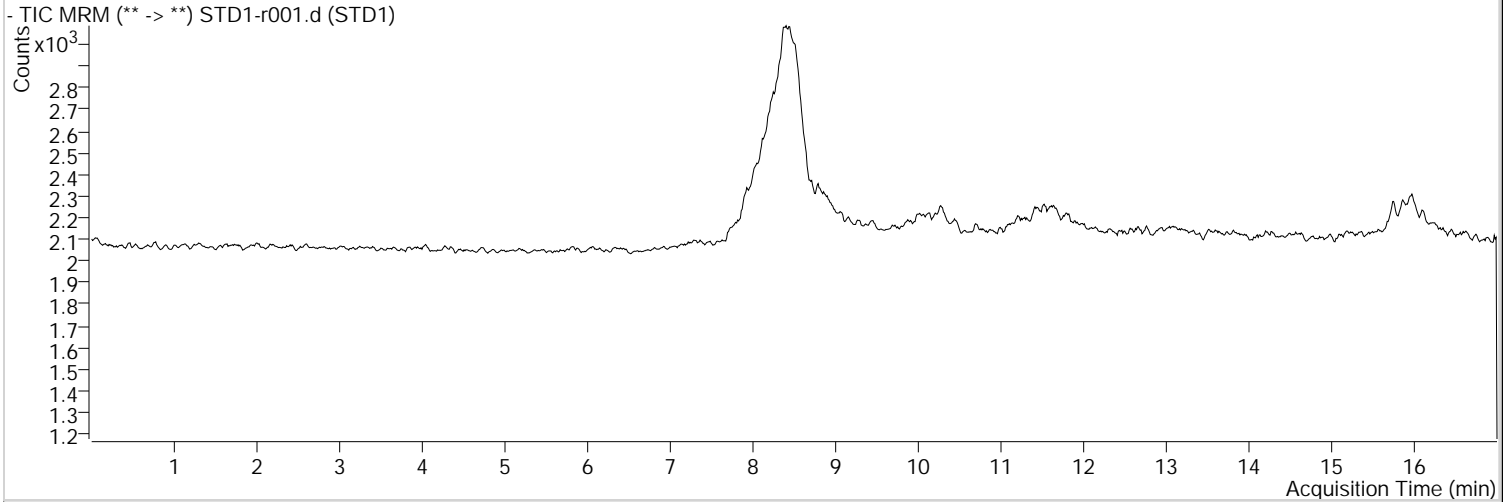

## 24-Ursolic acid

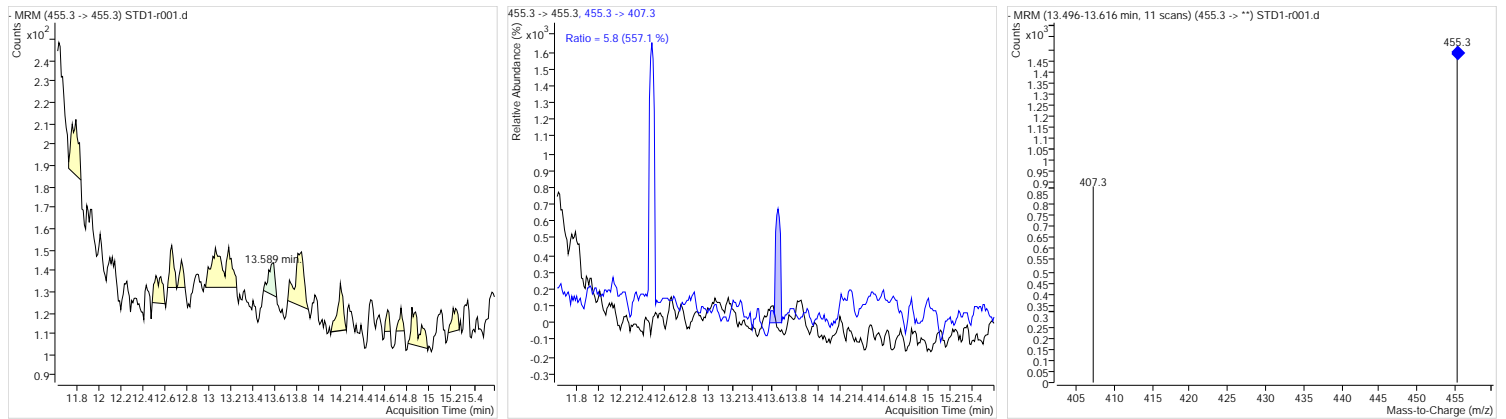

## 25-Oleanolic acid

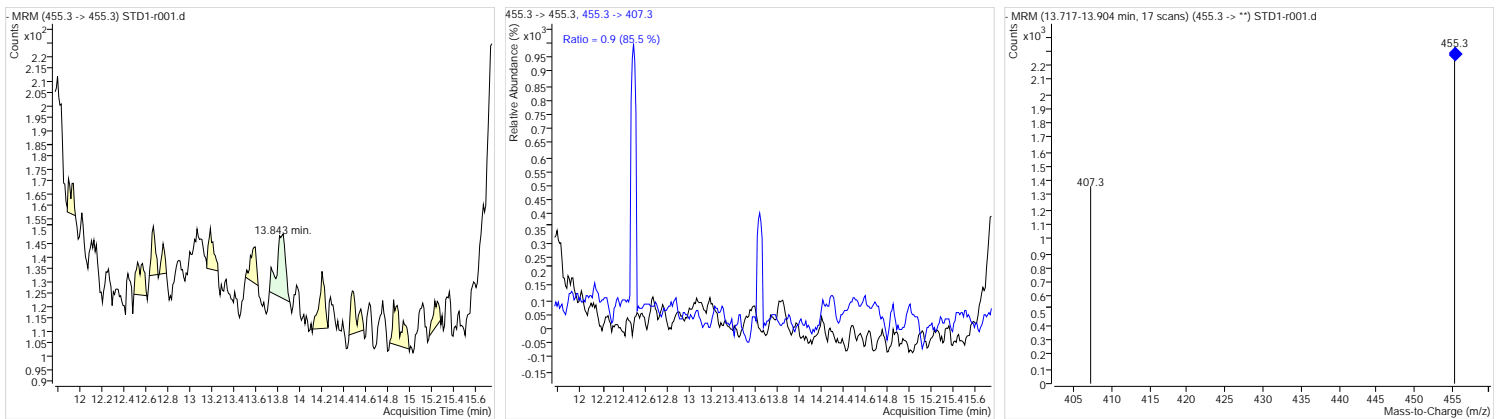

# Quantitative Analysis Complete Report

|                     |                                                                    |                      |                |
|---------------------|--------------------------------------------------------------------|----------------------|----------------|
| Batch Path          | D:\MassHunter\Data\WBR\2022\20220127-PA25\QuantResults\1.batch.bin |                      |                |
| Analysis Time       | 1/29/2022 11:06:08 AM                                              | Analyst Name         | admin-PC\admin |
| Report Time         | 1/29/2022 11:09:05 AM                                              | Reporter Name        | admin          |
| Last Calib Update   | 1/29/2022 11:06:07 AM                                              | Batch State          | Processed      |
| Quant Batch Version | B.07.01SP1                                                         | Quant Report Version | B.07.01 SP1    |

|             |                      |             |                 |
|-------------|----------------------|-------------|-----------------|
| Acq. Time   | 1/27/2022 9:11:14 PM | Data File   | STD1-r002.d     |
| Sample Type | Cal                  | Sample Name | STD1            |
| Dilution    | 1                    | Acq. Method | 20220127-PA25.m |

## Sample Chromatogram

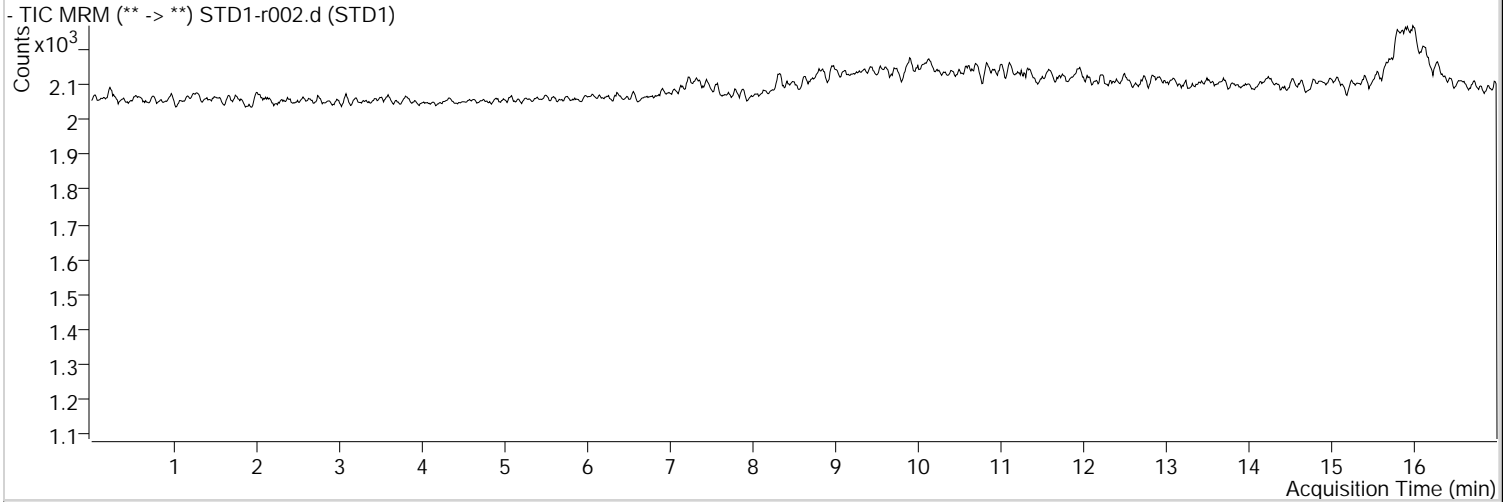

## 24-Ursolic acid

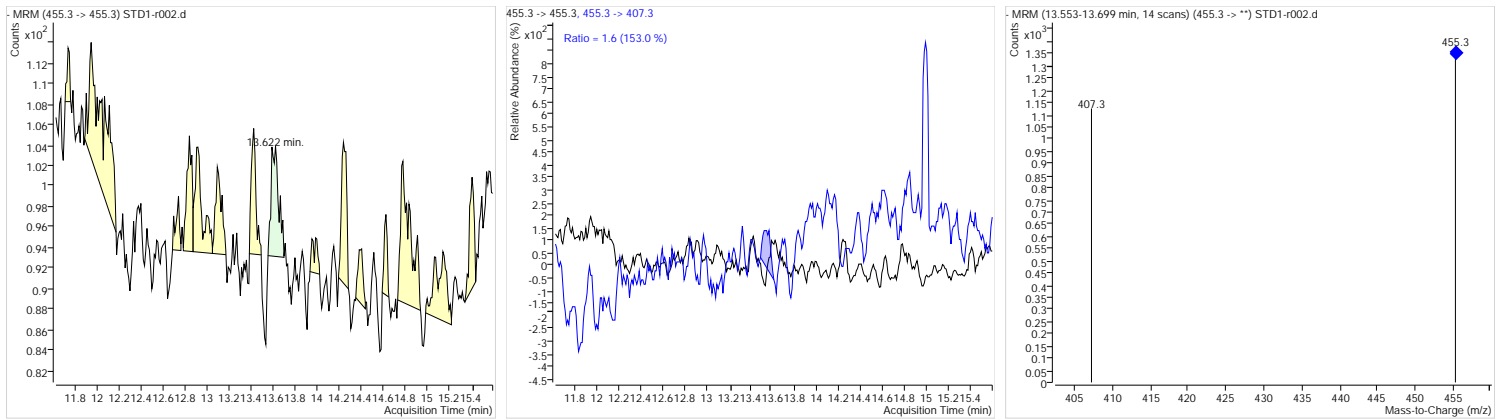

## 25-Oleanolic acid

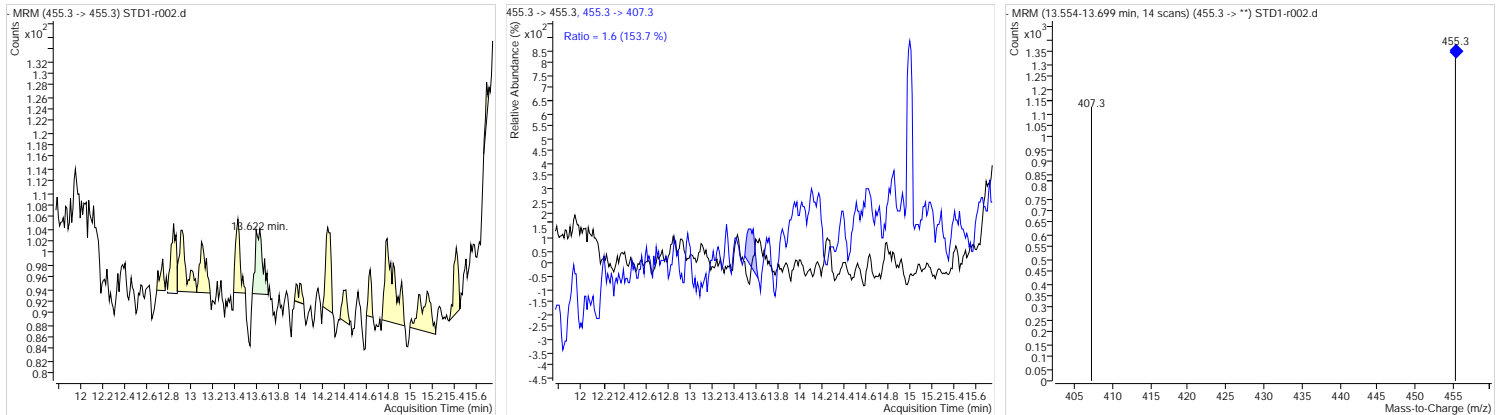

# Quantitative Analysis Complete Report

Batch Path D:\MassHunter\Data\WBR\2022\20220127-PA25\QuantResults\1.batch.bin  
Analysis Time 1/29/2022 11:06:08 AM Analyst Name admin-PC\admin  
Report Time 1/29/2022 11:09:09 AM Reporter Name admin  
Last Calib Update 1/29/2022 11:06:07 AM Batch State Processed  
Quant Batch Version B.07.01SP1 Quant Report Version B.07.01 SP1

Acq. Time 1/27/2022 9:28:55 PM Data File STD2-r001.d  
Sample Type Cal Sample Name STD2  
Dilution 1 Acq. Method 20220127-PA25.m

## Sample Chromatogram

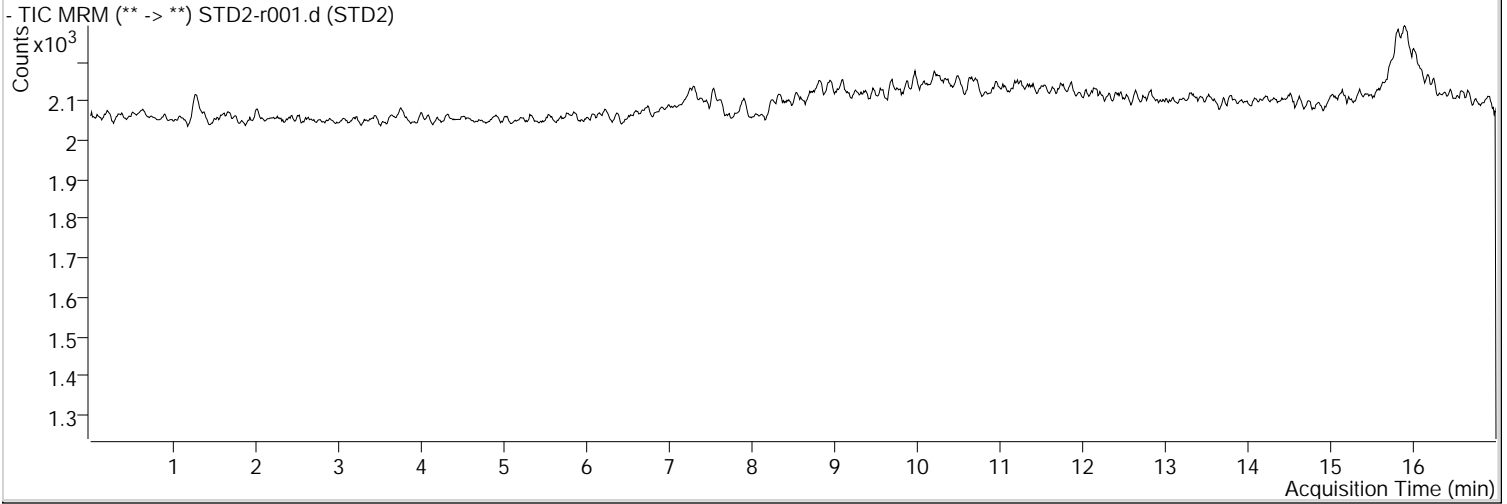

## 24-Ursolic acid

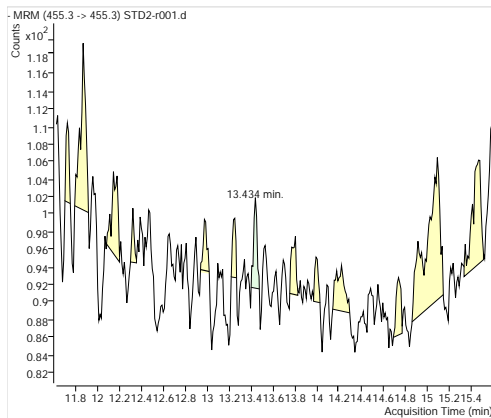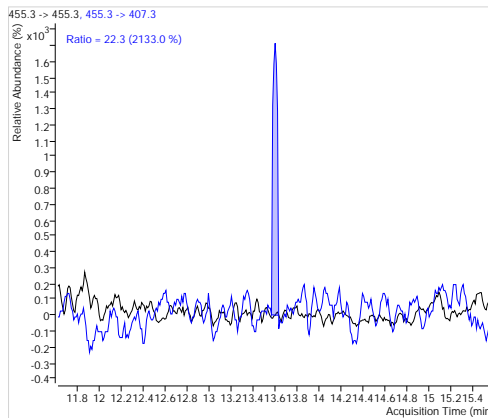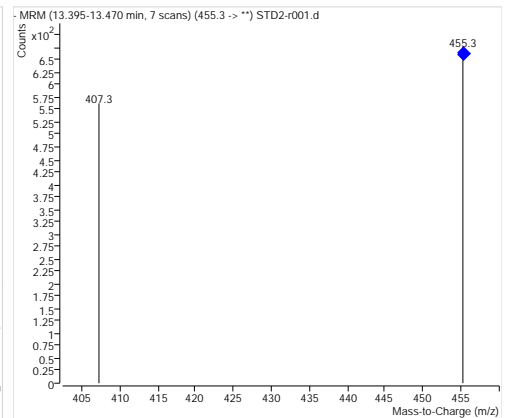

## 25-Oleanolic acid

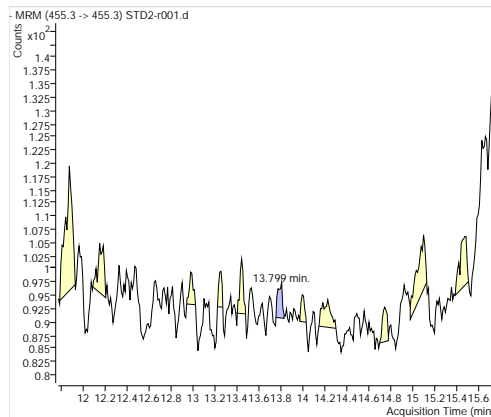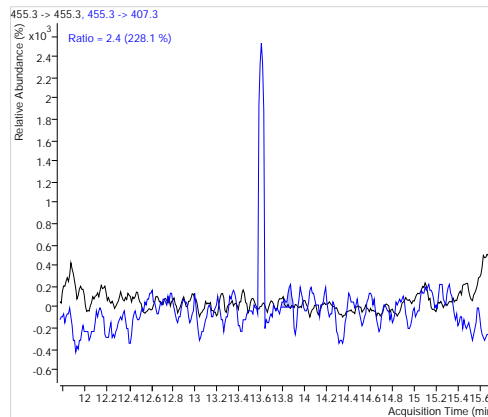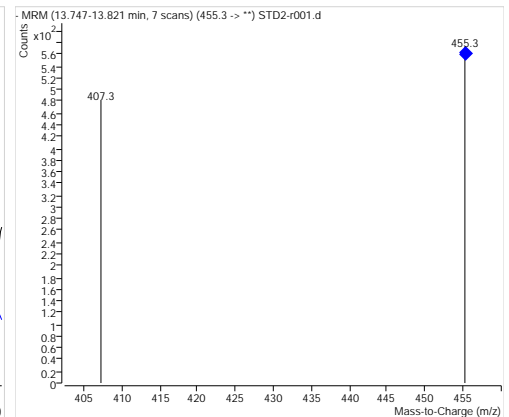

# Quantitative Analysis Complete Report

|                     |                                                                    |                      |                |
|---------------------|--------------------------------------------------------------------|----------------------|----------------|
| Batch Path          | D:\MassHunter\Data\WBR\2022\20220127-PA25\QuantResults\1.batch.bin | Analyst Name         | admin-PC\admin |
| Analysis Time       | 1/29/2022 11:06:08 AM                                              | Reporter Name        | admin          |
| Report Time         | 1/29/2022 11:09:12 AM                                              | Batch State          | Processed      |
| Last Calib Update   | 1/29/2022 11:06:07 AM                                              | Quant Report Version | B.07.01 SP1    |
| Quant Batch Version | B.07.01SP1                                                         |                      |                |

|             |                      |             |                 |
|-------------|----------------------|-------------|-----------------|
| Acq. Time   | 1/27/2022 9:46:38 PM | Data File   | STD2-r002.d     |
| Sample Type | Cal                  | Sample Name | STD2            |
| Dilution    | 1                    | Acq. Method | 20220127-PA25.m |

## Sample Chromatogram

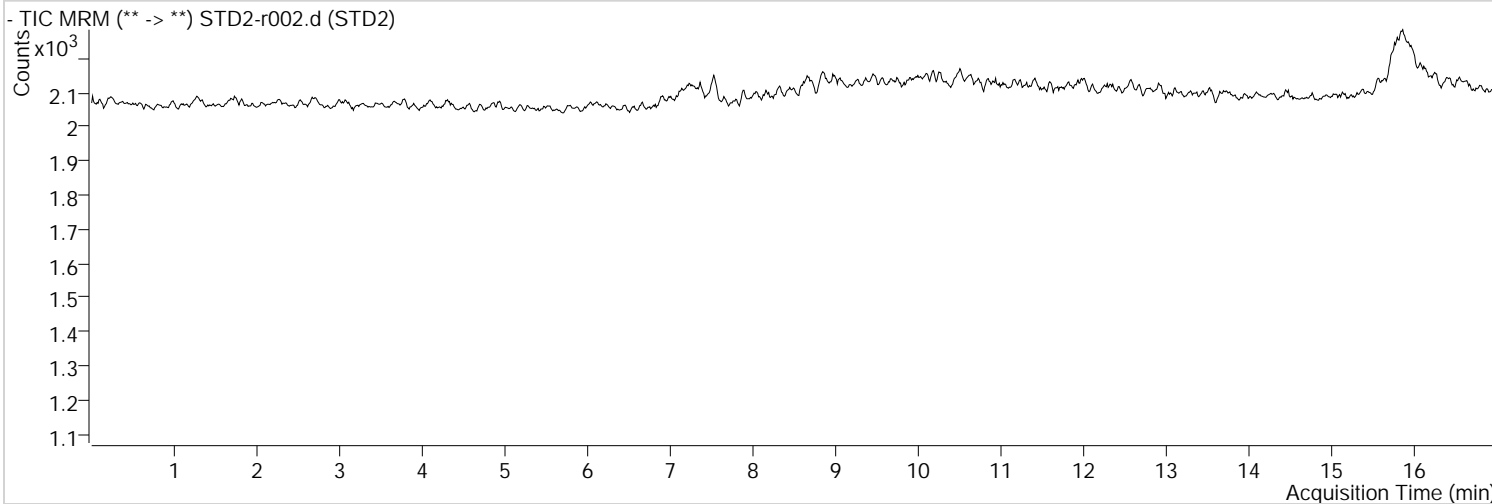

## 24-Ursolic acid

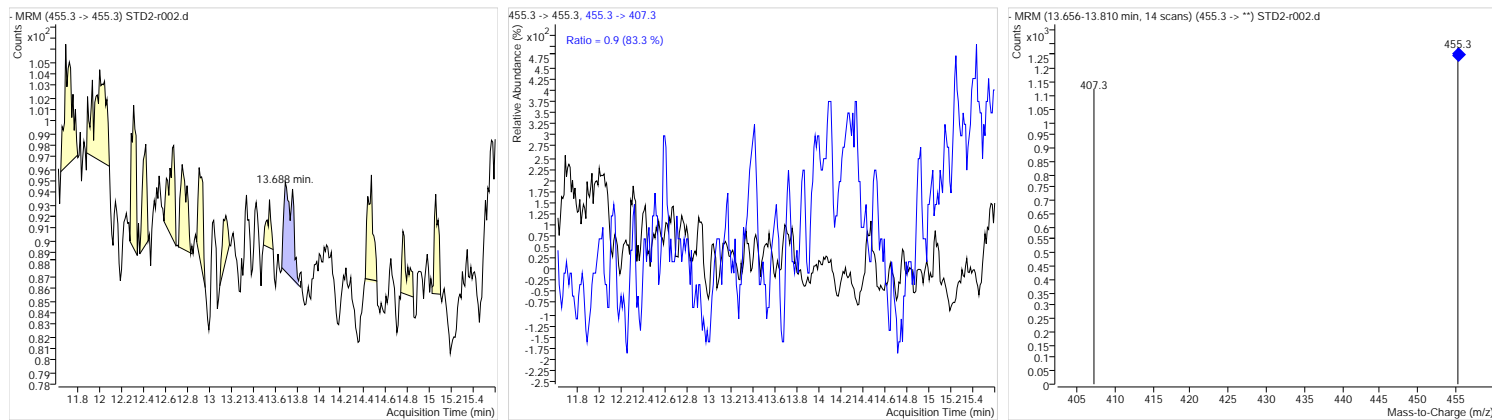

## 25-Oleanolic acid

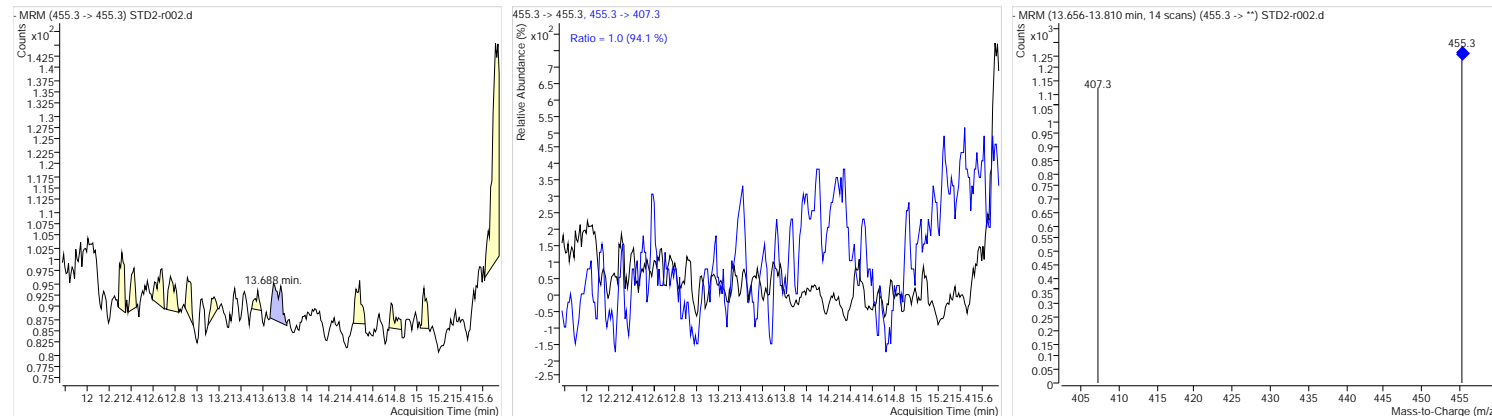

# Quantitative Analysis Complete Report

|                     |                                                                    |                      |                |
|---------------------|--------------------------------------------------------------------|----------------------|----------------|
| Batch Path          | D:\MassHunter\Data\WBR\2022\20220127-PA25\QuantResults\1.batch.bin |                      |                |
| Analysis Time       | 1/29/2022 11:06:08 AM                                              | Analyst Name         | admin-PC\admin |
| Report Time         | 1/29/2022 11:09:16 AM                                              | Reporter Name        | admin          |
| Last Calib Update   | 1/29/2022 11:06:07 AM                                              | Batch State          | Processed      |
| Quant Batch Version | B.07.01SP1                                                         | Quant Report Version | B.07.01 SP1    |

|             |                       |             |                 |
|-------------|-----------------------|-------------|-----------------|
| Acq. Time   | 1/27/2022 10:04:19 PM | Data File   | STD3-r001.d     |
| Sample Type | Cal                   | Sample Name | STD3            |
| Dilution    | 1                     | Acq. Method | 20220127-PA25.m |

## Sample Chromatogram

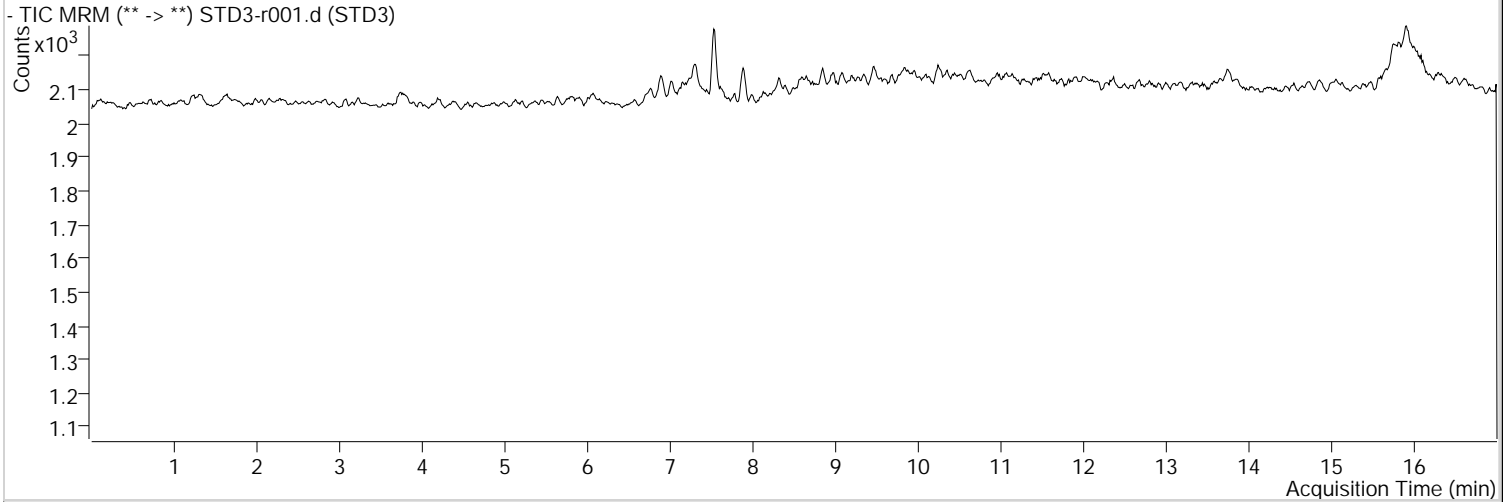

## 24-Ursolic acid

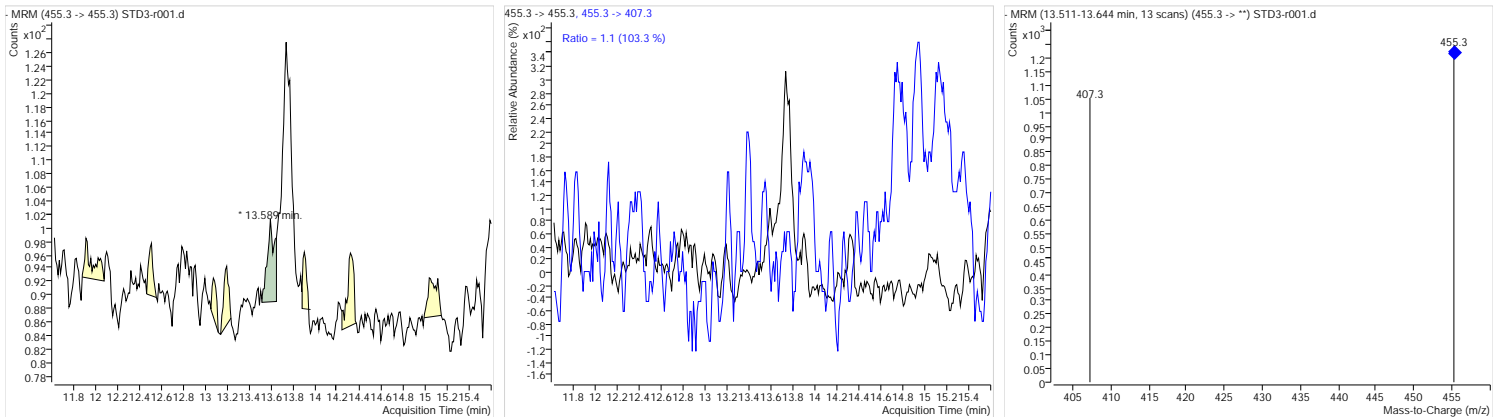

## 25-Oleanolic acid

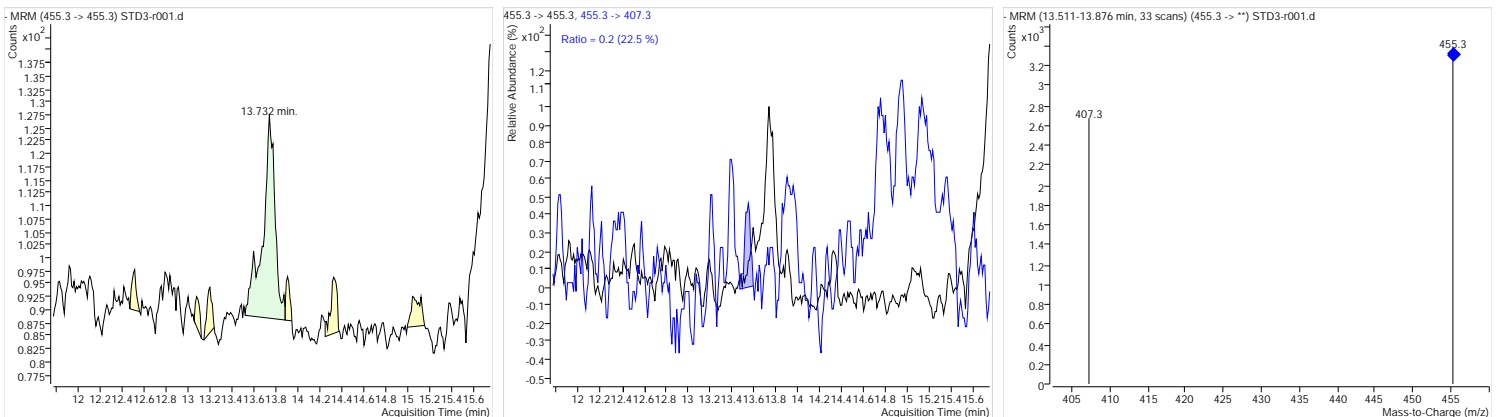

# Quantitative Analysis Complete Report

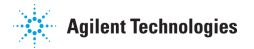

|                     |                                                                    |                      |                |
|---------------------|--------------------------------------------------------------------|----------------------|----------------|
| Batch Path          | D:\MassHunter\Data\WBR\2022\20220127-PA25\QuantResults\1.batch.bin | Analyst Name         | admin-PC\admin |
| Analysis Time       | 1/29/2022 11:06:08 AM                                              | Reporter Name        | admin          |
| Report Time         | 1/29/2022 11:09:20 AM                                              | Batch State          | Processed      |
| Last Calib Update   | 1/29/2022 11:06:07 AM                                              | Quant Report Version | B.07.01 SP1    |
| Quant Batch Version | B.07.01SP1                                                         |                      |                |

|             |                       |             |                 |
|-------------|-----------------------|-------------|-----------------|
| Acq. Time   | 1/27/2022 10:22:01 PM | Data File   | STD3-r002.d     |
| Sample Type | Cal                   | Sample Name | STD3            |
| Dilution    | 1                     | Acq. Method | 20220127-PA25.m |

## Sample Chromatogram

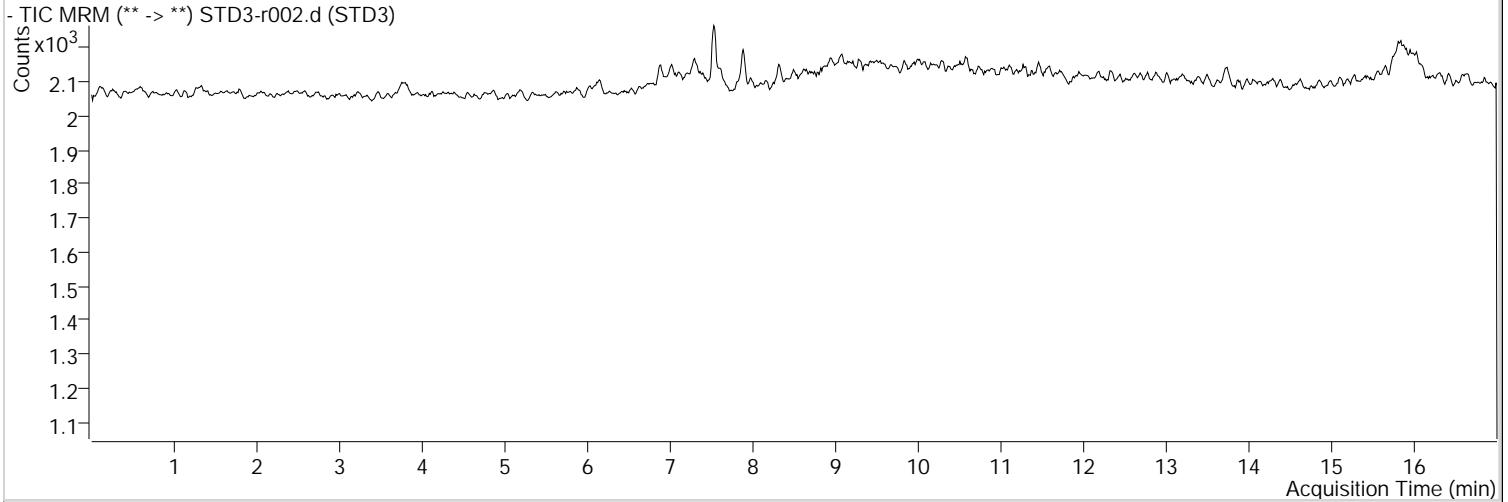

## 24-Ursolic acid

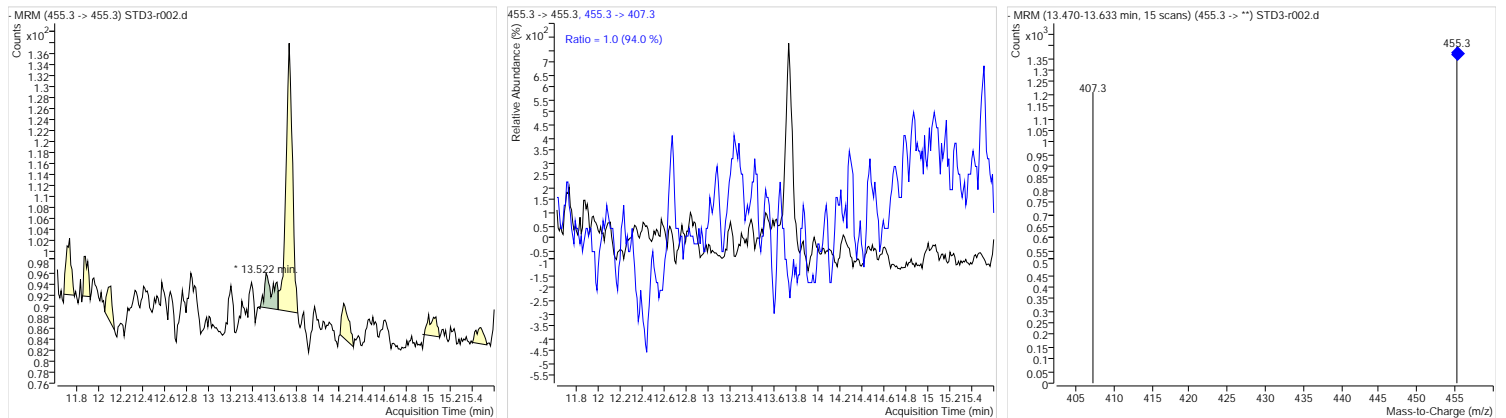

## 25-Oleanolic acid

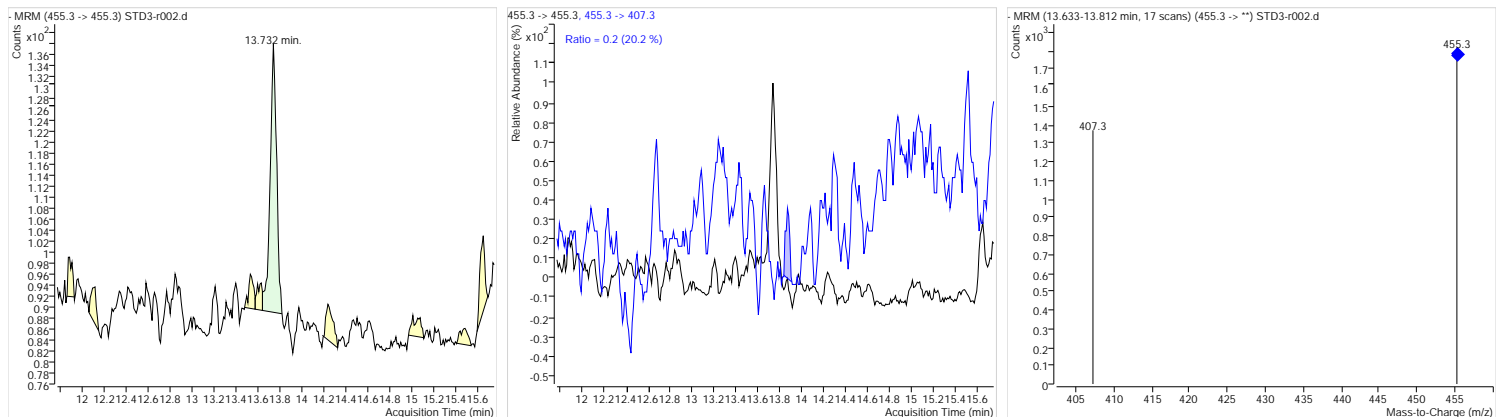

# Quantitative Analysis Complete Report

|                     |                                                                    |                      |                |
|---------------------|--------------------------------------------------------------------|----------------------|----------------|
| Batch Path          | D:\MassHunter\Data\WBR\2022\20220127-PA25\QuantResults\1.batch.bin | Analyst Name         | admin-PC\admin |
| Analysis Time       | 1/29/2022 11:06:08 AM                                              | Reporter Name        | admin          |
| Report Time         | 1/29/2022 11:09:23 AM                                              | Batch State          | Processed      |
| Last Calib Update   | 1/29/2022 11:06:07 AM                                              | Quant Report Version | B.07.01 SP1    |
| Quant Batch Version | B.07.01SP1                                                         |                      |                |

|             |                       |             |                 |
|-------------|-----------------------|-------------|-----------------|
| Acq. Time   | 1/27/2022 10:39:42 PM | Data File   | STD4-r001.d     |
| Sample Type | Cal                   | Sample Name | STD4            |
| Dilution    | 1                     | Acq. Method | 20220127-PA25.m |

## Sample Chromatogram

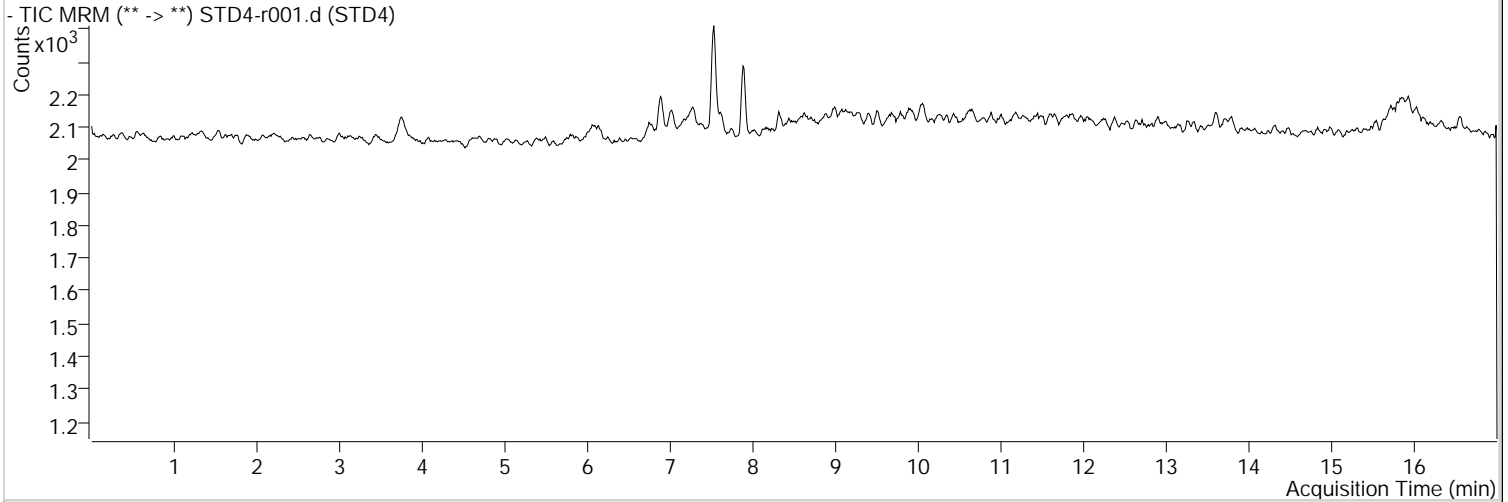

## 24-Ursolic acid

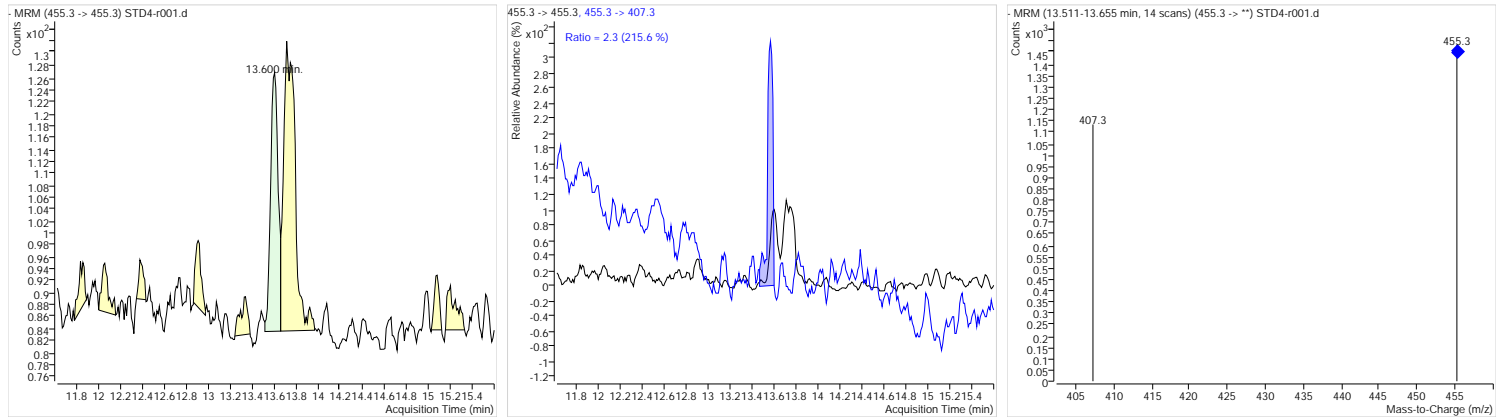

## 25-Oleanolic acid

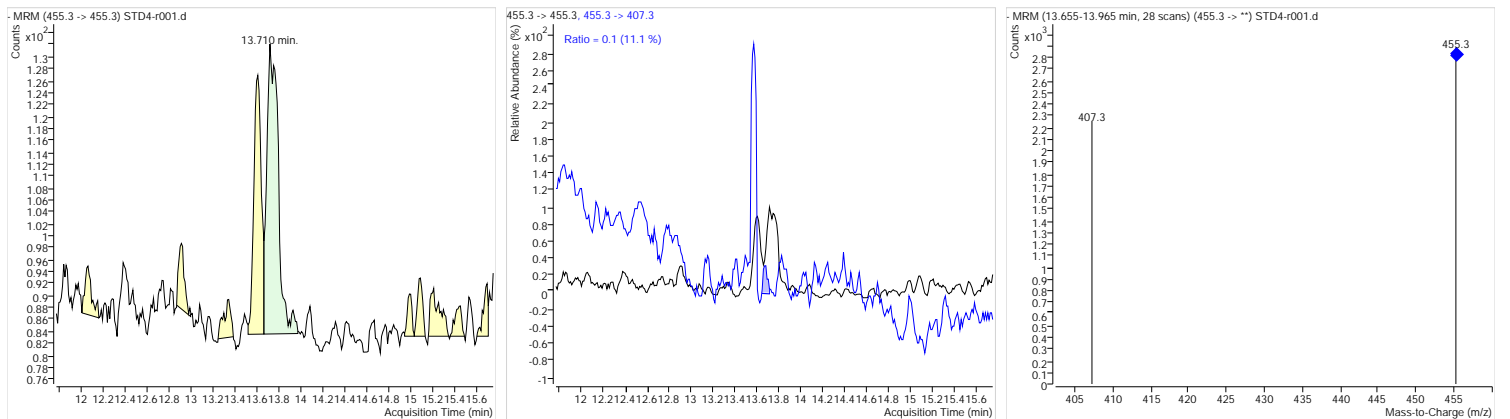



# Quantitative Analysis Complete Report

|                     |                                                                    |                      |                |
|---------------------|--------------------------------------------------------------------|----------------------|----------------|
| Batch Path          | D:\MassHunter\Data\WBR\2022\20220127-PA25\QuantResults\1.batch.bin |                      |                |
| Analysis Time       | 1/29/2022 11:06:08 AM                                              | Analyst Name         | admin-PC\admin |
| Report Time         | 1/29/2022 11:09:27 AM                                              | Reporter Name        | admin          |
| Last Calib Update   | 1/29/2022 11:06:07 AM                                              | Batch State          | Processed      |
| Quant Batch Version | B.07.01SP1                                                         | Quant Report Version | B.07.01 SP1    |

|             |                       |             |                 |
|-------------|-----------------------|-------------|-----------------|
| Acq. Time   | 1/27/2022 10:57:24 PM | Data File   | STD4-r002.d     |
| Sample Type | Cal                   | Sample Name | STD4            |
| Dilution    | 1                     | Acq. Method | 20220127-PA25.m |

## Sample Chromatogram

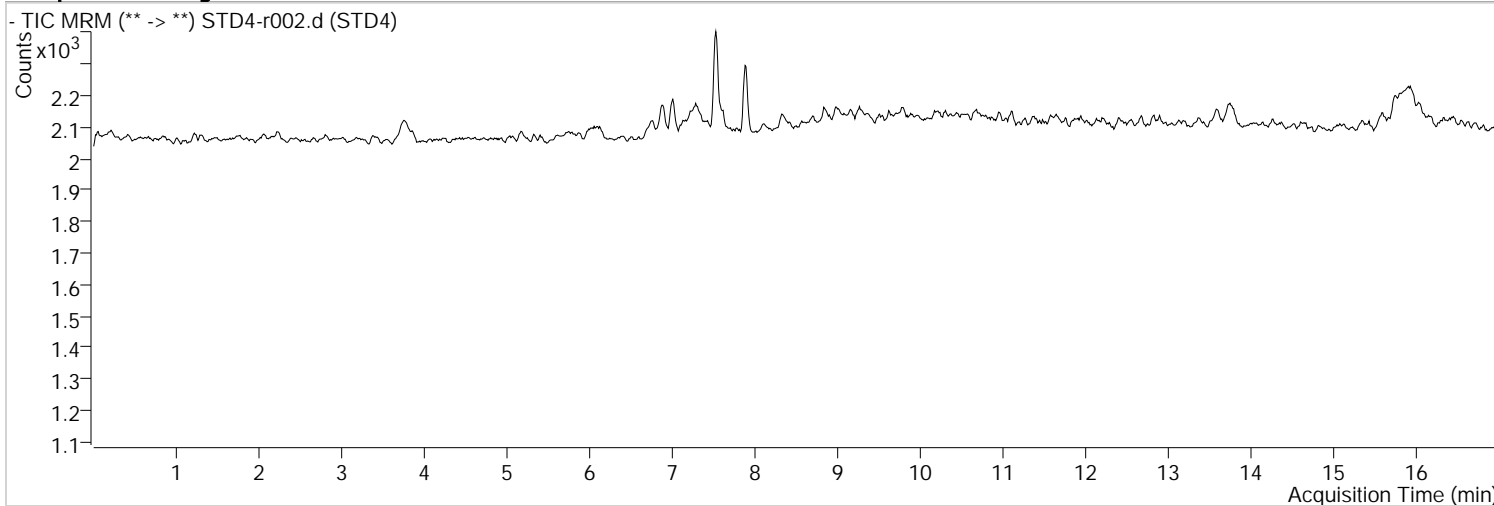

## 24-Ursolic acid

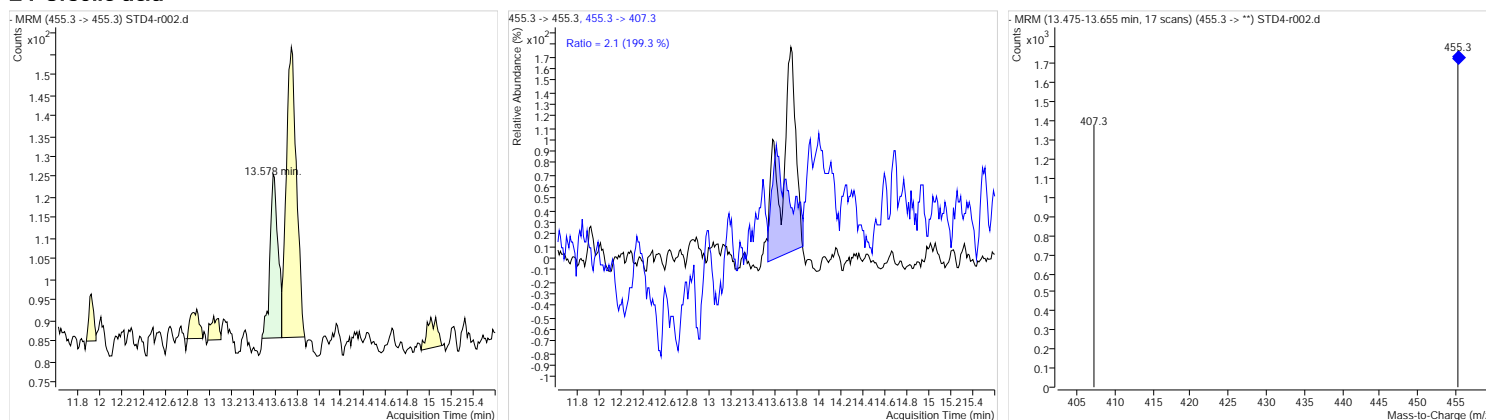

## 25-Oleanolic acid

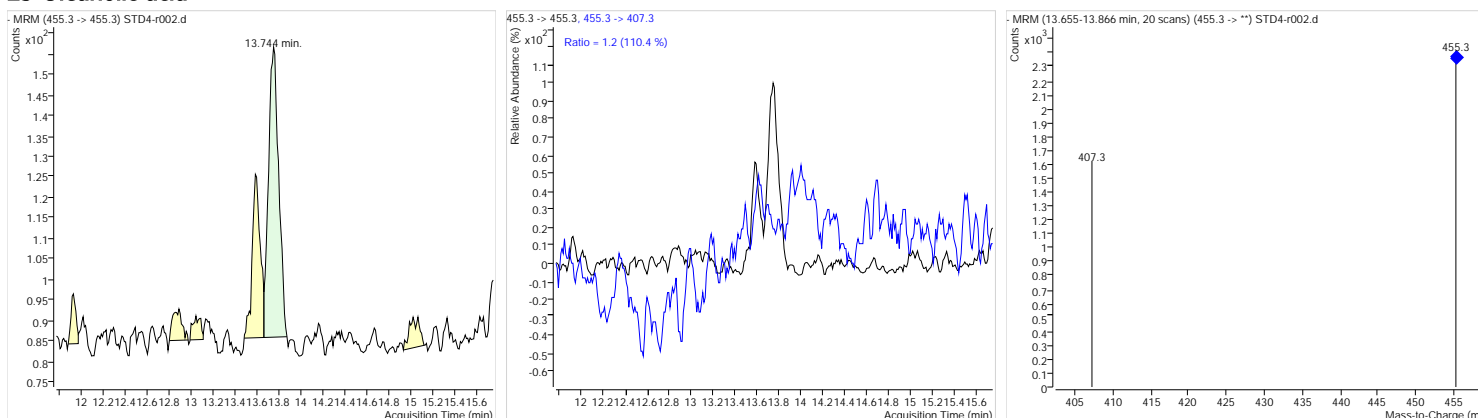

# Quantitative Analysis Complete Report

|                     |                                                                    |                      |                |
|---------------------|--------------------------------------------------------------------|----------------------|----------------|
| Batch Path          | D:\MassHunter\Data\WBR\2022\20220127-PA25\QuantResults\1.batch.bin | Analyst Name         | admin-PC\admin |
| Analysis Time       | 1/29/2022 11:06:08 AM                                              | Reporter Name        | admin          |
| Report Time         | 1/29/2022 11:09:31 AM                                              | Batch State          | Processed      |
| Last Calib Update   | 1/29/2022 11:06:07 AM                                              | Quant Report Version | B.07.01 SP1    |
| Quant Batch Version | B.07.01SP1                                                         |                      |                |

|             |                       |             |                 |
|-------------|-----------------------|-------------|-----------------|
| Acq. Time   | 1/27/2022 11:15:04 PM | Data File   | STD5.d          |
| Sample Type | Cal                   | Sample Name | STD5            |
| Dilution    | 1                     | Acq. Method | 20220127-PA25.m |

## Sample Chromatogram

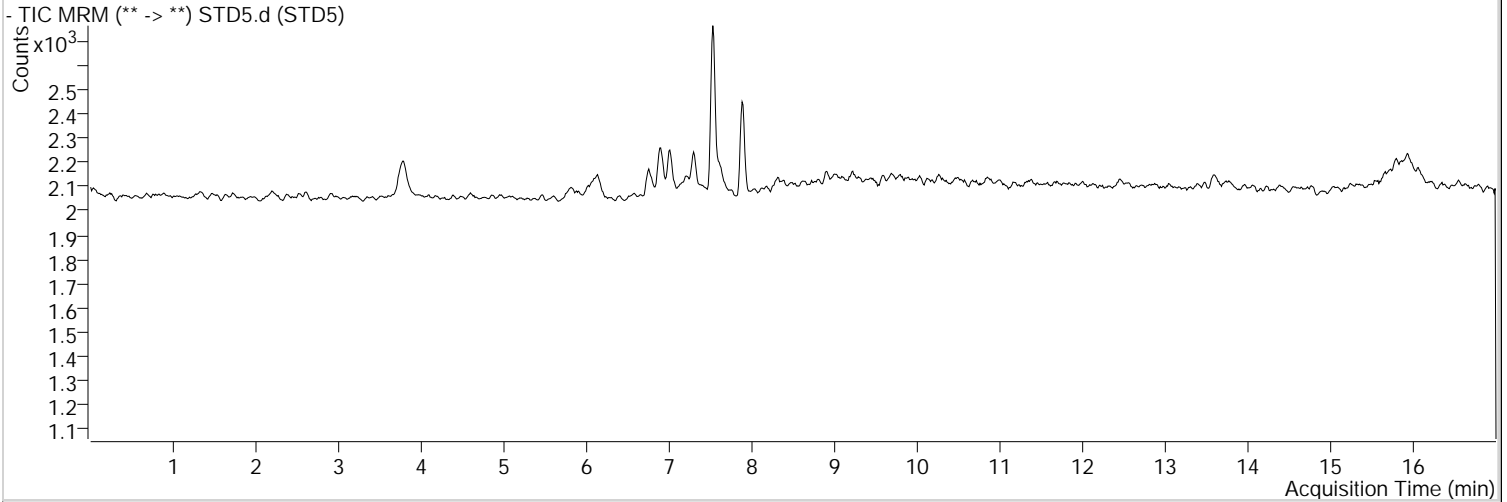

## 24-Ursolic acid

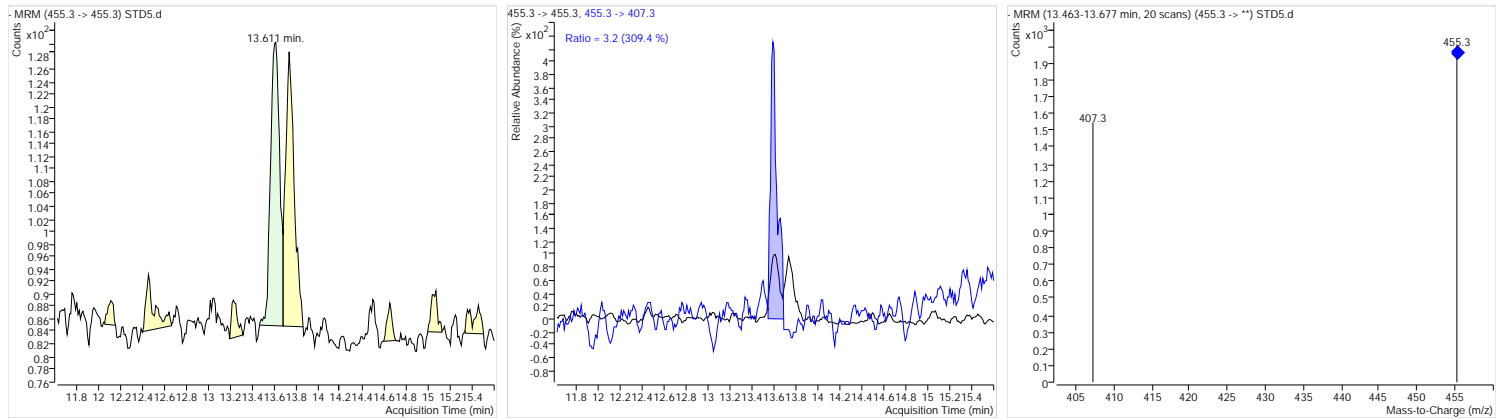

## 25-Oleanolic acid

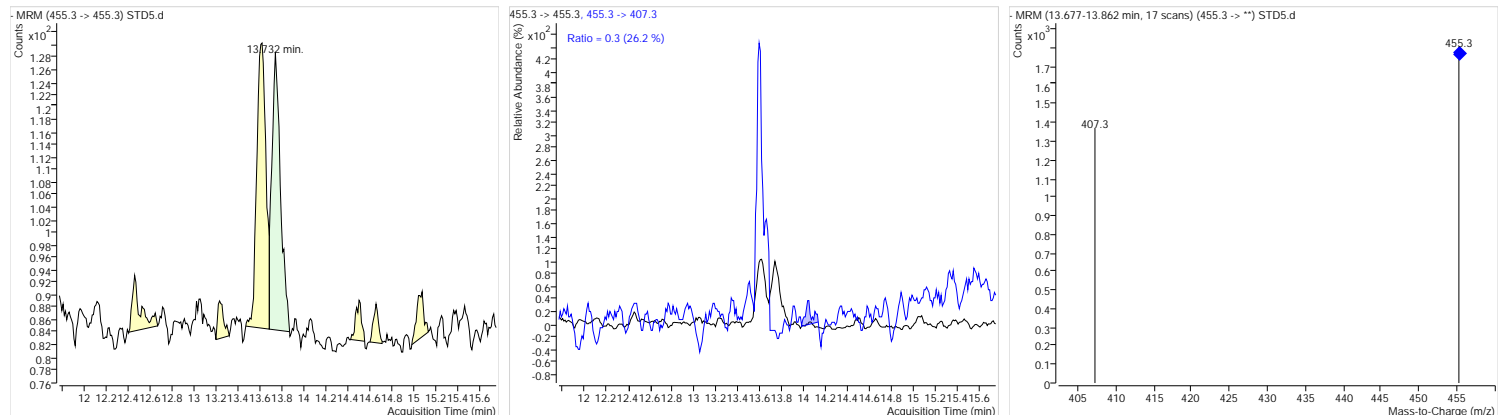

# Quantitative Analysis Complete Report

|                     |                                                                    |                      |                |
|---------------------|--------------------------------------------------------------------|----------------------|----------------|
| Batch Path          | D:\MassHunter\Data\WBR\2022\20220127-PA25\QuantResults\1.batch.bin | Analyst Name         | admin-PC\admin |
| Analysis Time       | 1/29/2022 11:06:08 AM                                              | Reporter Name        | admin          |
| Report Time         | 1/29/2022 11:09:35 AM                                              | Batch State          | Processed      |
| Last Calib Update   | 1/29/2022 11:06:07 AM                                              | Quant Report Version | B.07.01 SP1    |
| Quant Batch Version | B.07.01SP1                                                         |                      |                |

|             |                       |             |                 |
|-------------|-----------------------|-------------|-----------------|
| Acq. Time   | 1/27/2022 11:32:44 PM | Data File   | STD6.d          |
| Sample Type | Cal                   | Sample Name | STD6            |
| Dilution    | 1                     | Acq. Method | 20220127-PA25.m |

## Sample Chromatogram

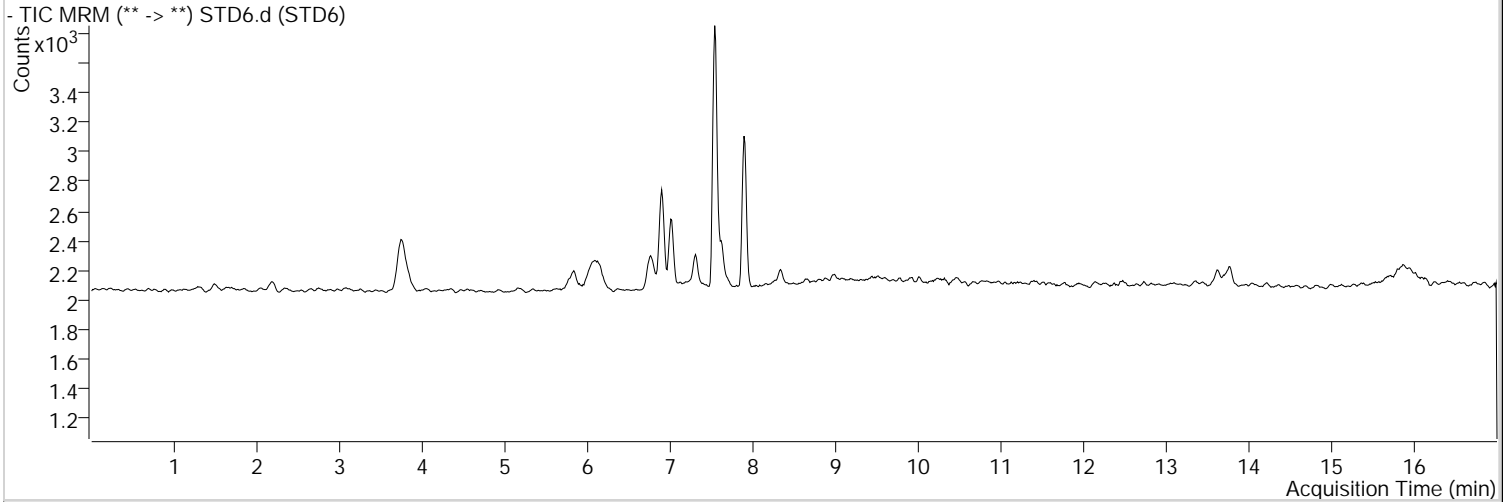

## 24-Ursolic acid

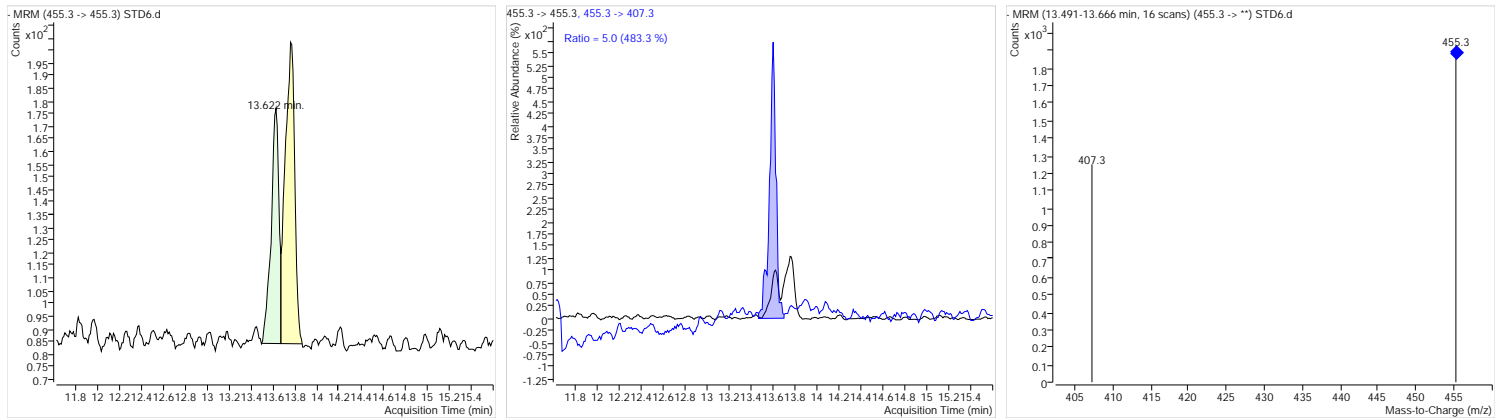

## 25-Oleanolic acid

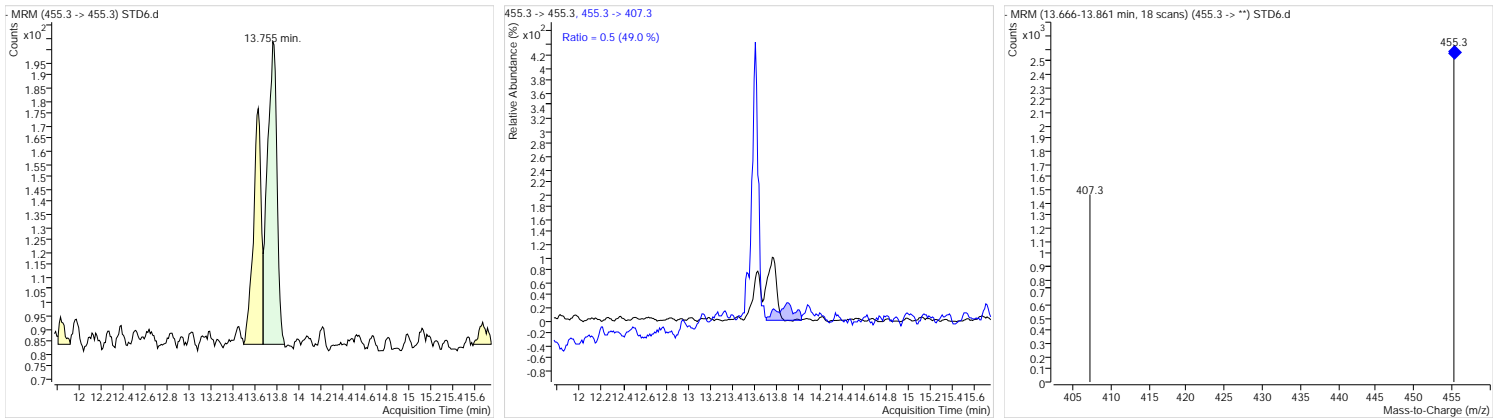

# Quantitative Analysis Complete Report

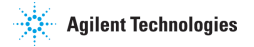

|                     |                                                                    |                      |                |
|---------------------|--------------------------------------------------------------------|----------------------|----------------|
| Batch Path          | D:\MassHunter\Data\WBR\2022\20220127-PA25\QuantResults\1.batch.bin |                      |                |
| Analysis Time       | 1/29/2022 11:06:08 AM                                              | Analyst Name         | admin-PC\admin |
| Report Time         | 1/29/2022 11:09:38 AM                                              | Reporter Name        | admin          |
| Last Calib Update   | 1/29/2022 11:06:07 AM                                              | Batch State          | Processed      |
| Quant Batch Version | B.07.01SP1                                                         | Quant Report Version | B.07.01 SP1    |

|             |                       |             |                 |
|-------------|-----------------------|-------------|-----------------|
| Acq. Time   | 1/27/2022 11:50:24 PM | Data File   | STD7.d          |
| Sample Type | Cal                   | Sample Name | STD7            |
| Dilution    | 1                     | Acq. Method | 20220127-PA25.m |

## Sample Chromatogram

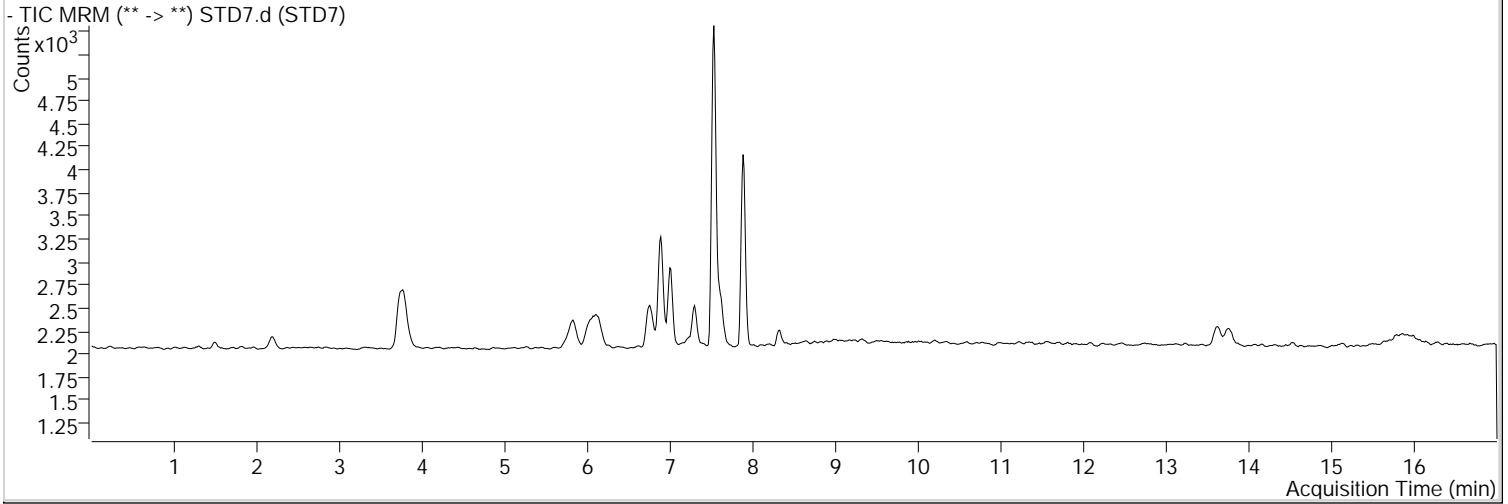

## 24-Ursolic acid

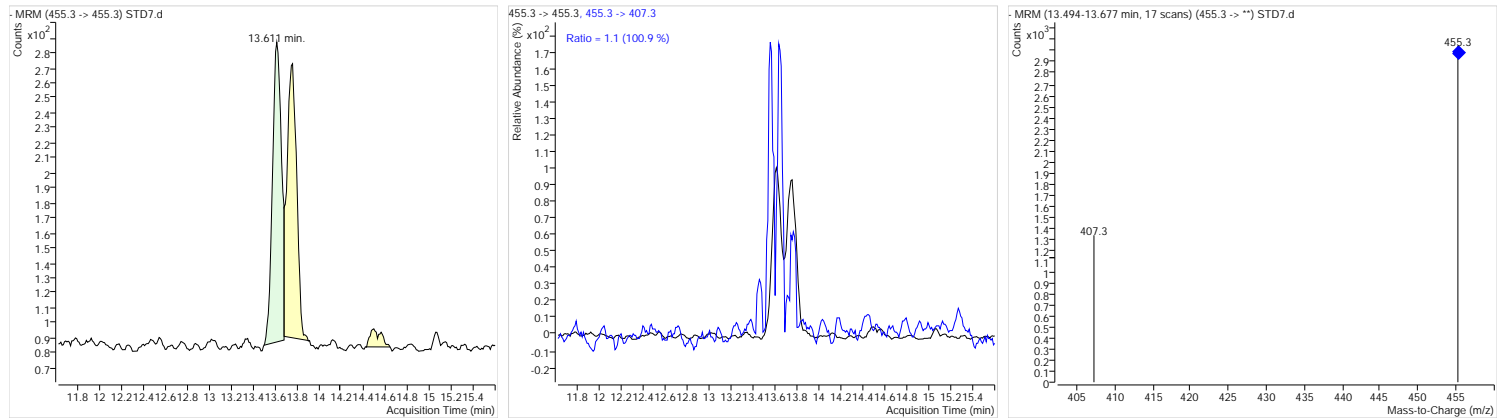

## 25-Oleanolic acid

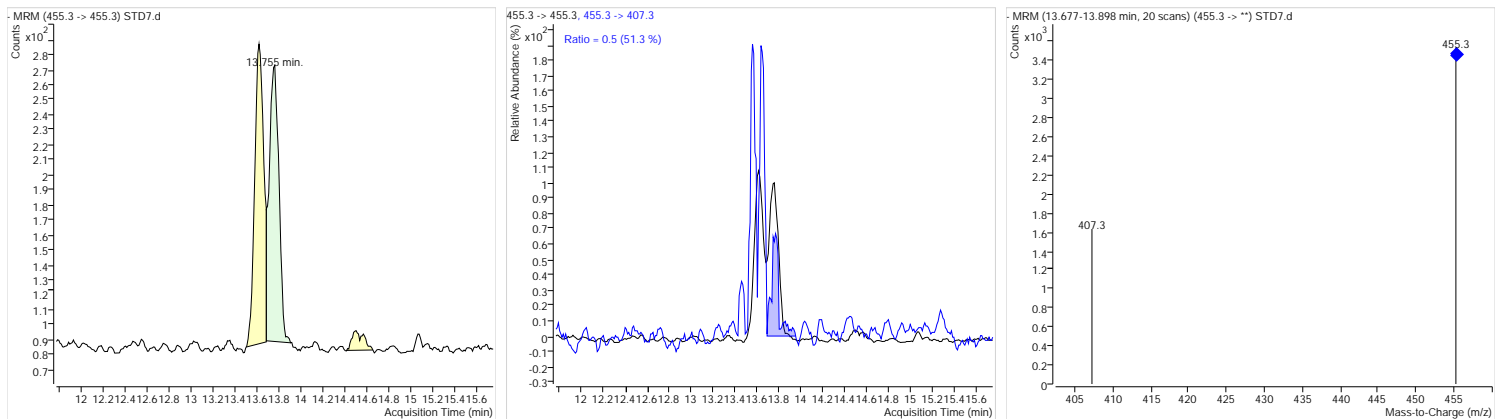

# Quantitative Analysis Complete Report

Batch Path D:\MassHunter\Data\WBR\2022\20220127-PA25\QuantResults\1.batch.bin  
Analysis Time 1/29/2022 11:06:08 AM Analyst Name admin-PC\admin  
Report Time 1/29/2022 11:09:42 AM Reporter Name admin  
Last Calib Update 1/29/2022 11:06:07 AM Batch State Processed  
Quant Batch Version B.07.01SP1 Quant Report Version B.07.01 SP1

Acq. Time 1/28/2022 12:08:05 AM Data File STD8.d  
Sample Type Cal Sample Name STD8  
Dilution 1 Acq. Method 20220127-PA25.m

## Sample Chromatogram

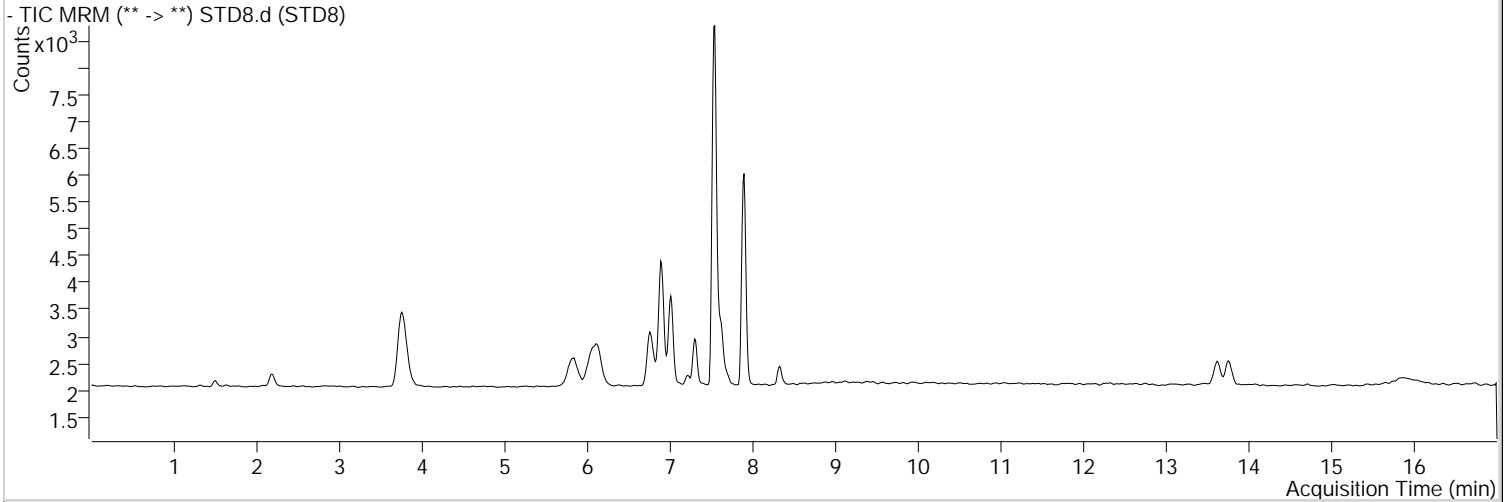

## 24-Ursolic acid

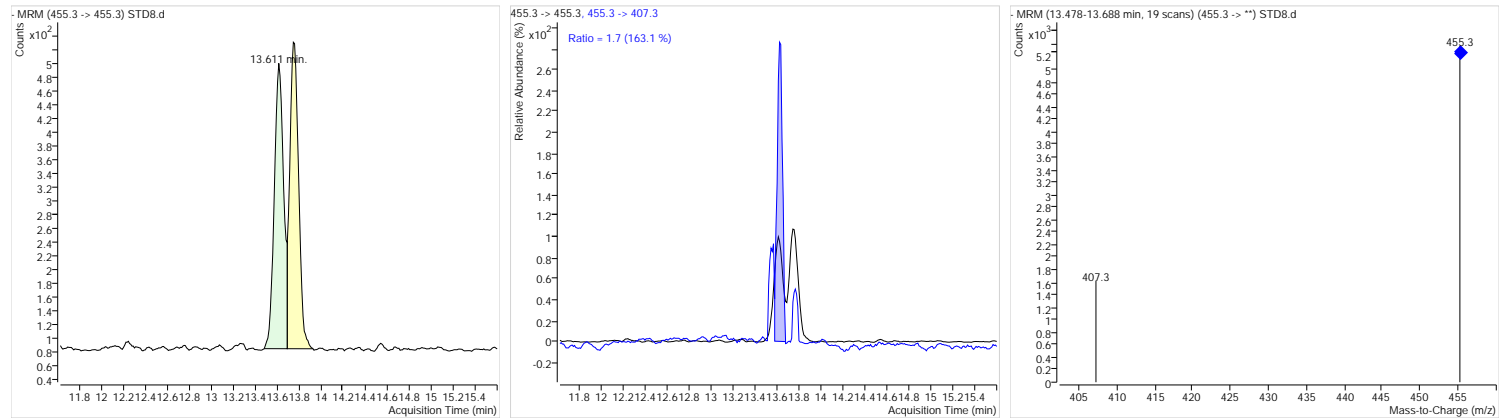

## 25-Oleanolic acid

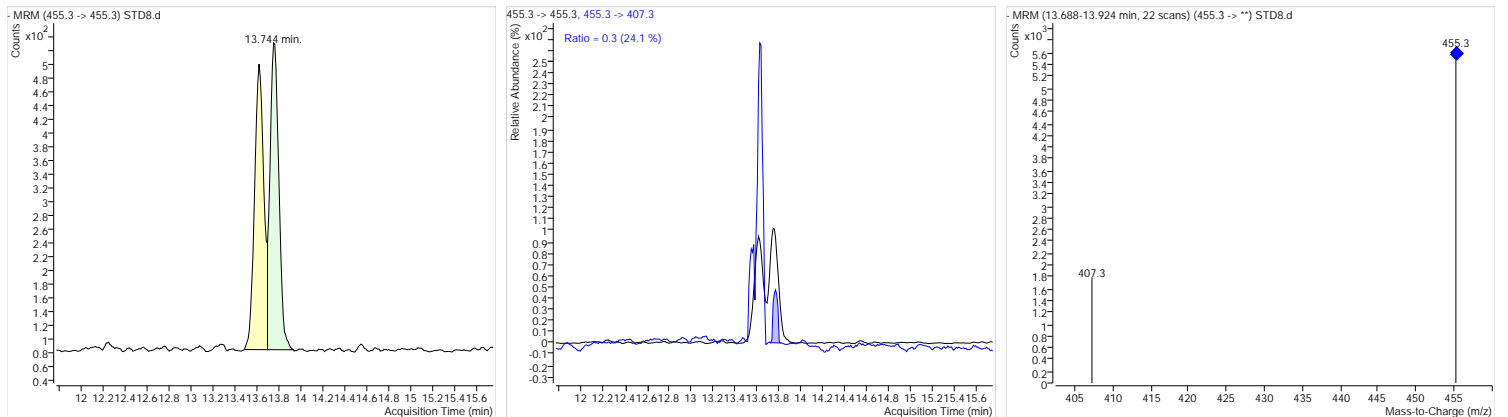

# Quantitative Analysis Complete Report

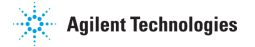

Batch Path D:\MassHunter\Data\WBR\2022\20220127-PA25\QuantResults\1.batch.bin  
Analysis Time 1/29/2022 11:06:08 AM Analyst Name admin-PC\admin  
Report Time 1/29/2022 11:09:49 AM Reporter Name admin  
Last Calib Update 1/29/2022 11:06:07 AM Batch State Processed  
Quant Batch Version B.07.01SP1 Quant Report Version B.07.01 SP1

Acq. Time 1/28/2022 12:43:31 AM Data File D1-r001.d  
Sample Type Sample Sample Name D1  
Dilution 1 Acq. Method 20220127-PA25.m

## Sample Chromatogram

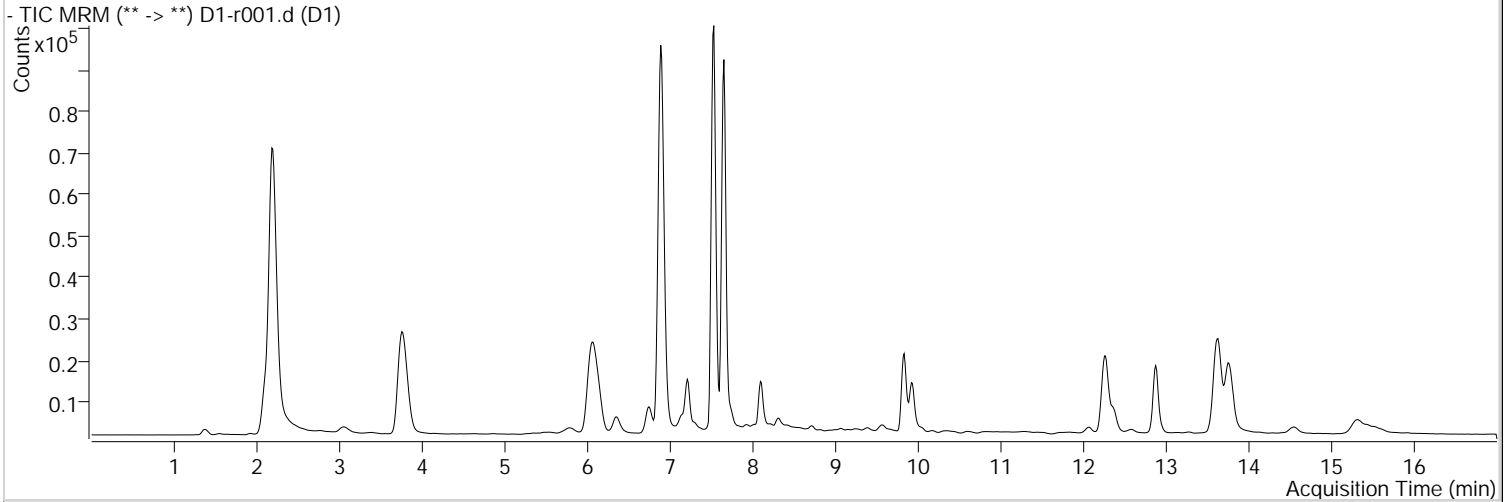

## 24-Ursolic acid

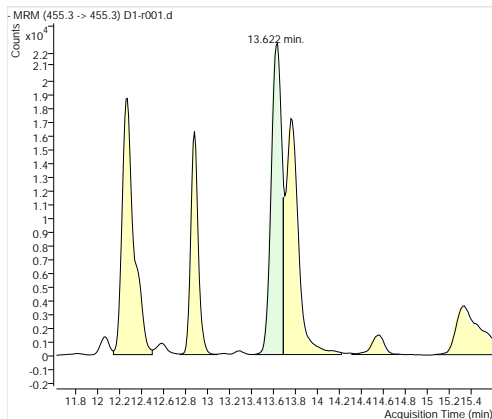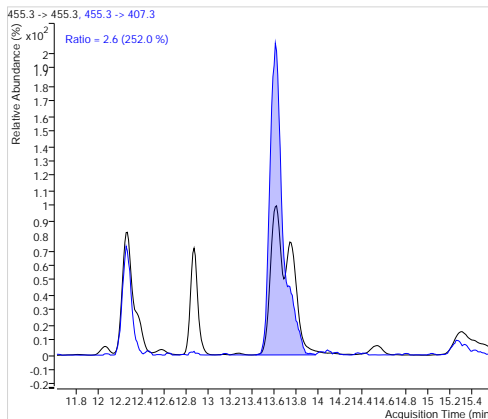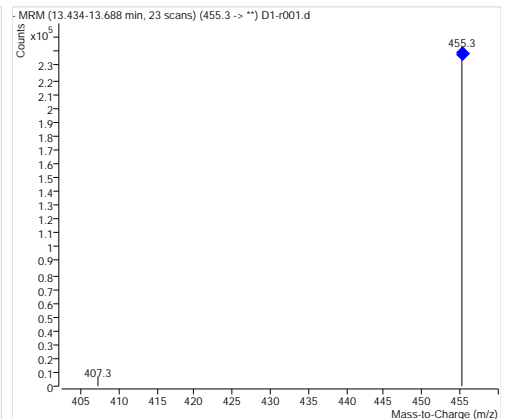

## 25-Oleanolic acid

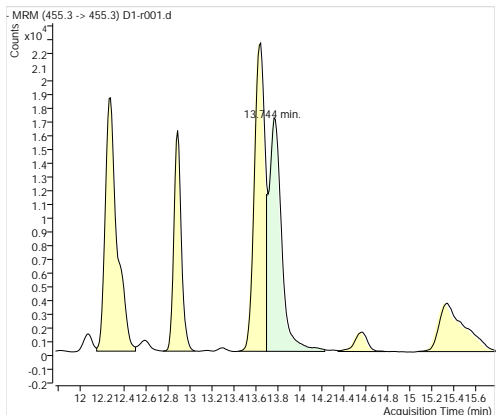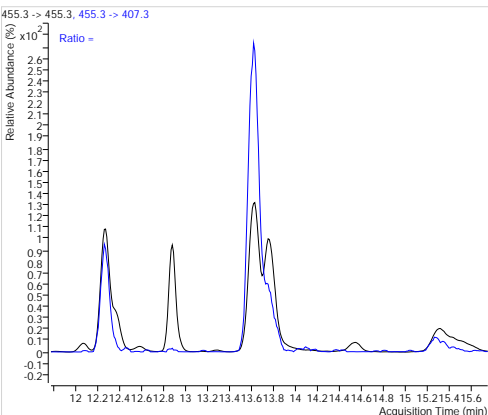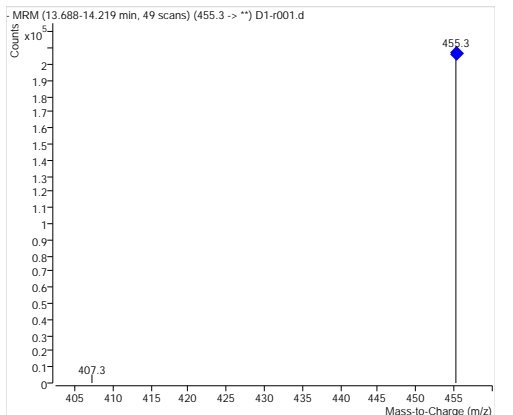

# Quantitative Analysis Complete Report

|                     |                                                                    |                      |                |
|---------------------|--------------------------------------------------------------------|----------------------|----------------|
| Batch Path          | D:\MassHunter\Data\WBR\2022\20220127-PA25\QuantResults\1.batch.bin |                      |                |
| Analysis Time       | 1/29/2022 11:06:08 AM                                              | Analyst Name         | admin-PC\admin |
| Report Time         | 1/29/2022 11:09:52 AM                                              | Reporter Name        | admin          |
| Last Calib Update   | 1/29/2022 11:06:07 AM                                              | Batch State          | Processed      |
| Quant Batch Version | B.07.01SP1                                                         | Quant Report Version | B.07.01 SP1    |

|             |                      |             |                 |
|-------------|----------------------|-------------|-----------------|
| Acq. Time   | 1/28/2022 1:01:13 AM | Data File   | D1-r002.d       |
| Sample Type | Sample               | Sample Name | D1              |
| Dilution    | 1                    | Acq. Method | 20220127-PA25.m |

## Sample Chromatogram

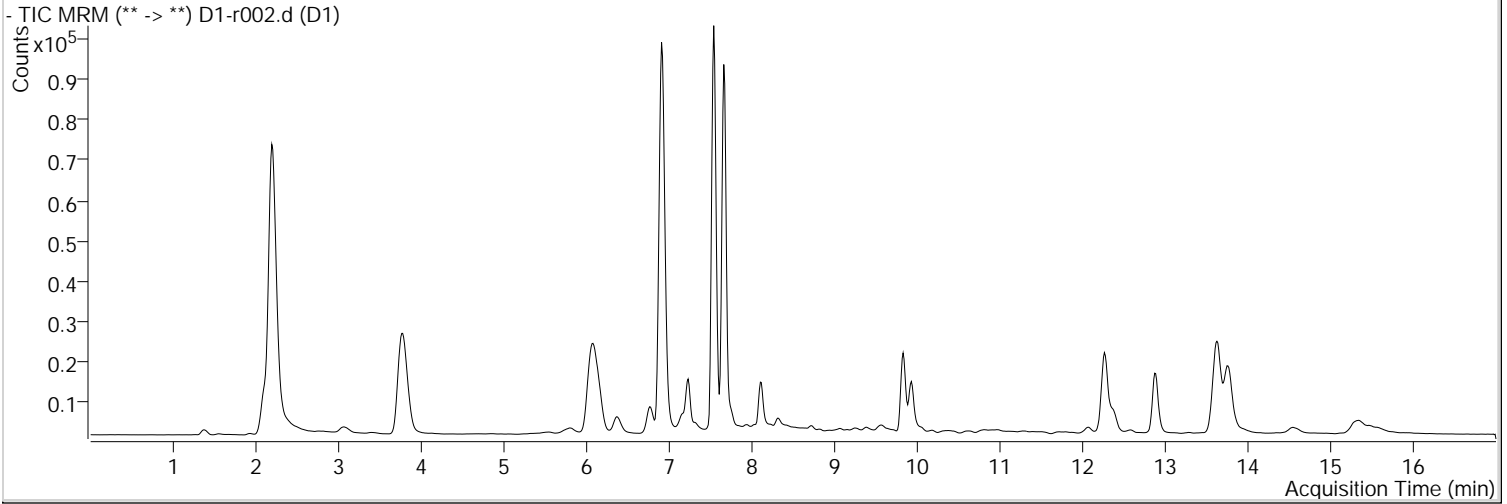

## 24-Ursolic acid

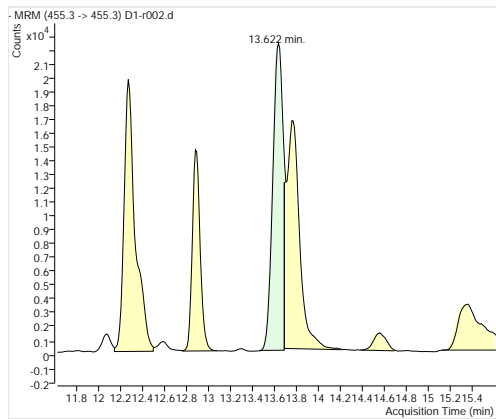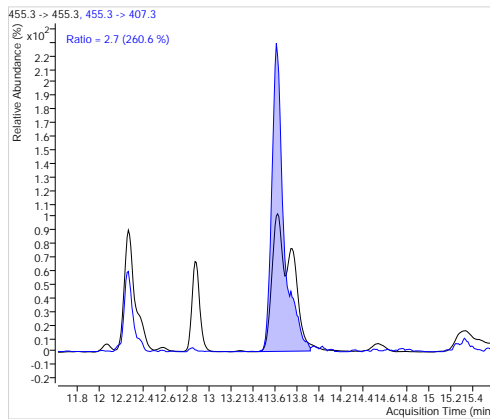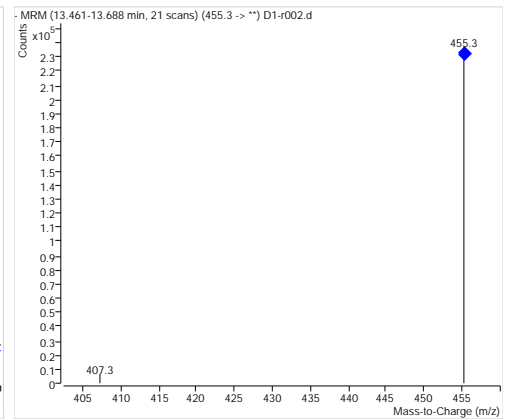

## 25-Oleanolic acid

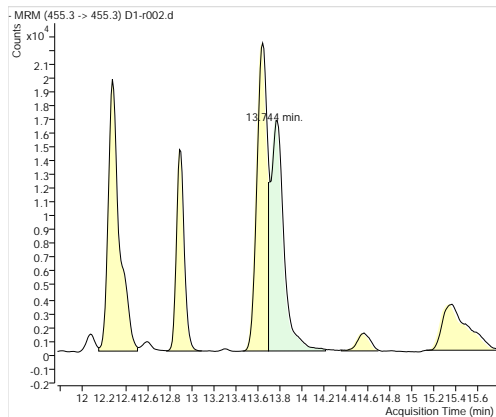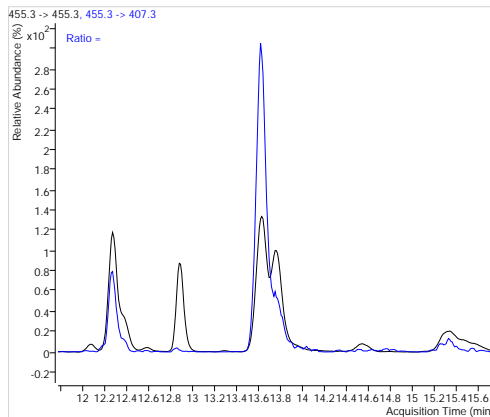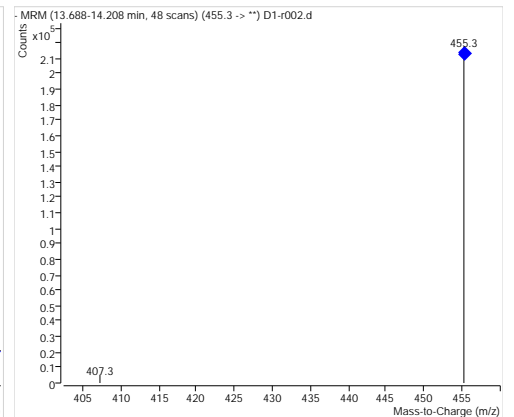

# Quantitative Analysis Complete Report

|                     |                                                                    |                      |                |
|---------------------|--------------------------------------------------------------------|----------------------|----------------|
| Batch Path          | D:\MassHunter\Data\WBR\2022\20220127-PA25\QuantResults\1.batch.bin |                      |                |
| Analysis Time       | 1/29/2022 11:06:08 AM                                              | Analyst Name         | admin-PC\admin |
| Report Time         | 1/29/2022 11:09:56 AM                                              | Reporter Name        | admin          |
| Last Calib Update   | 1/29/2022 11:06:07 AM                                              | Batch State          | Processed      |
| Quant Batch Version | B.07.01SP1                                                         | Quant Report Version | B.07.01 SP1    |

|             |                      |             |                 |
|-------------|----------------------|-------------|-----------------|
| Acq. Time   | 1/28/2022 1:18:56 AM | Data File   | D1-r003.d       |
| Sample Type | Sample               | Sample Name | D1              |
| Dilution    | 1                    | Acq. Method | 20220127-PA25.m |

## Sample Chromatogram

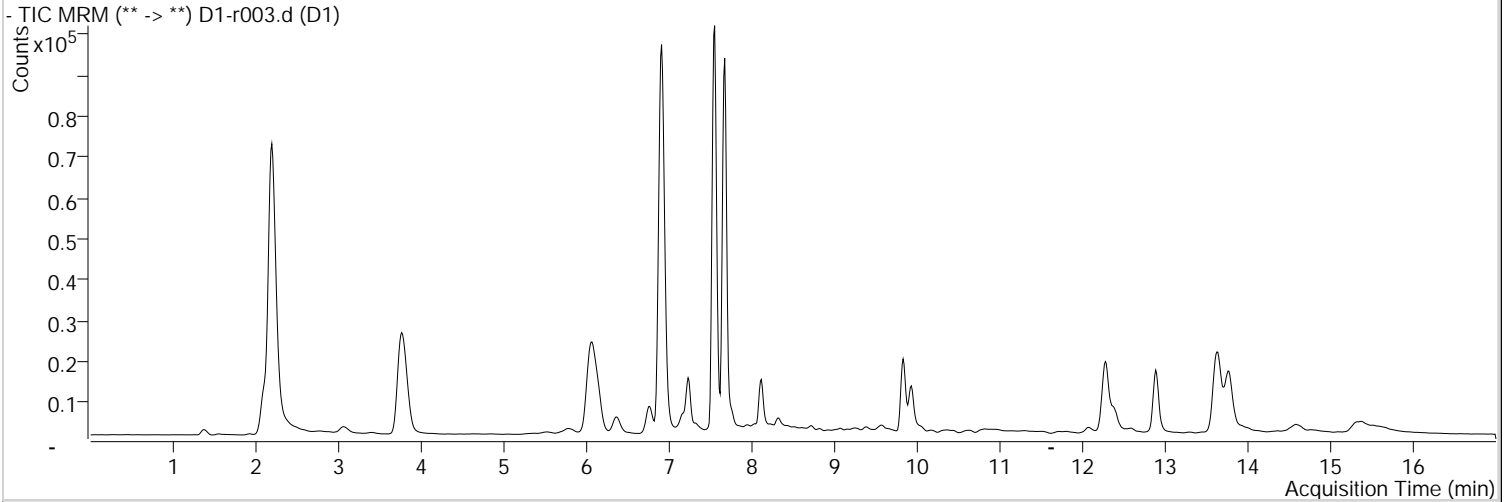

## 24-Ursolic acid

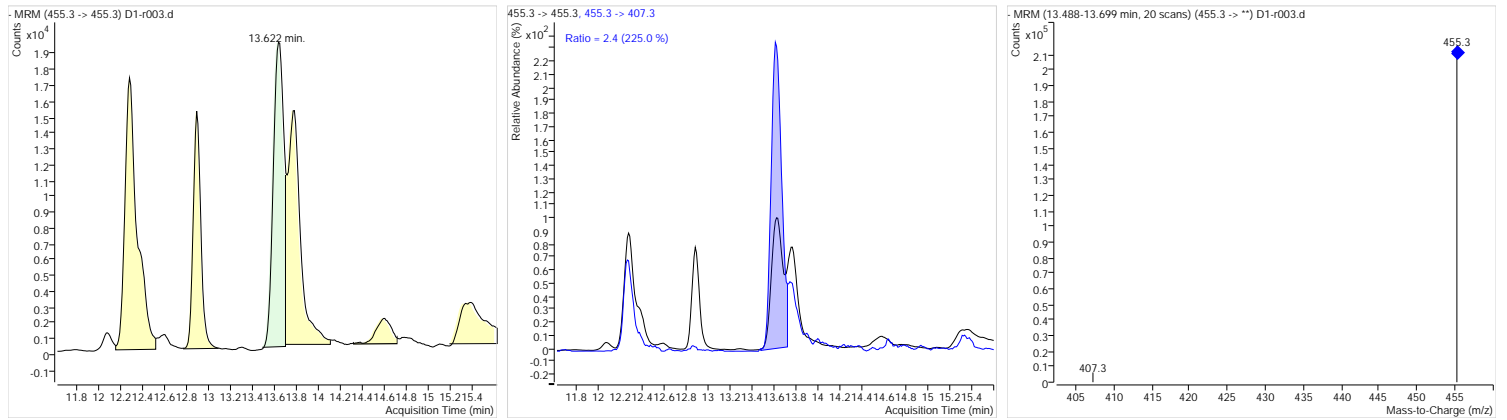

## 25-Oleanolic acid

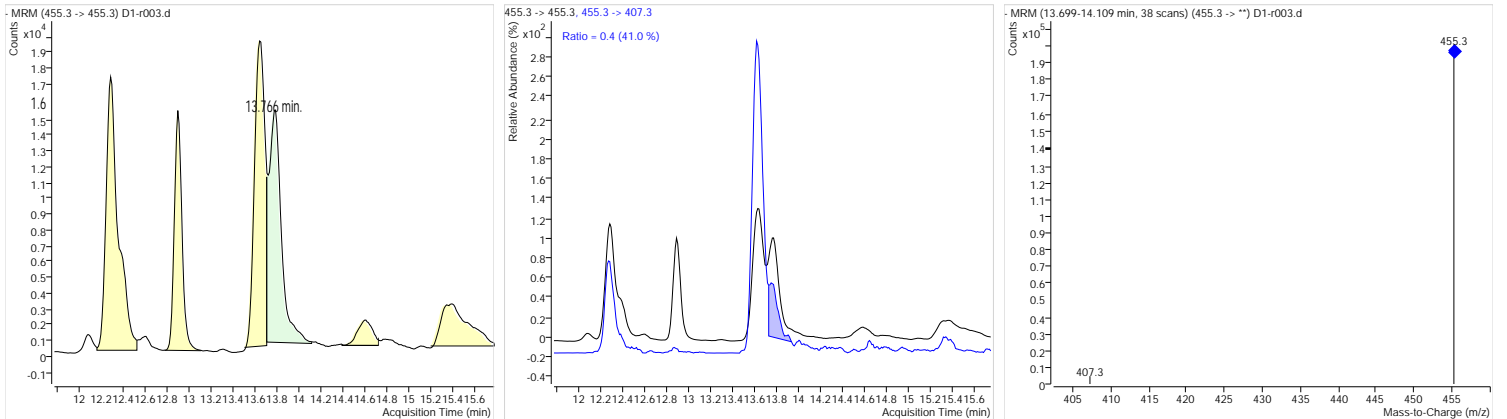



# Quantitative Analysis Complete Report

|                     |                                                                    |                      |                |
|---------------------|--------------------------------------------------------------------|----------------------|----------------|
| Batch Path          | D:\MassHunter\Data\WBR\2022\20220127-PA25\QuantResults\1.batch.bin |                      |                |
| Analysis Time       | 1/29/2022 11:06:08 AM                                              | Analyst Name         | admin-PC\admin |
| Report Time         | 1/29/2022 11:09:59 AM                                              | Reporter Name        | admin          |
| Last Calib Update   | 1/29/2022 11:06:07 AM                                              | Batch State          | Processed      |
| Quant Batch Version | B.07.01SP1                                                         | Quant Report Version | B.07.01 SP1    |

|             |                      |             |                 |
|-------------|----------------------|-------------|-----------------|
| Acq. Time   | 1/28/2022 1:36:39 AM | Data File   | D2.d            |
| Sample Type | Sample               | Sample Name | D2              |
| Dilution    | 1                    | Acq. Method | 20220127-PA25.m |

## Sample Chromatogram

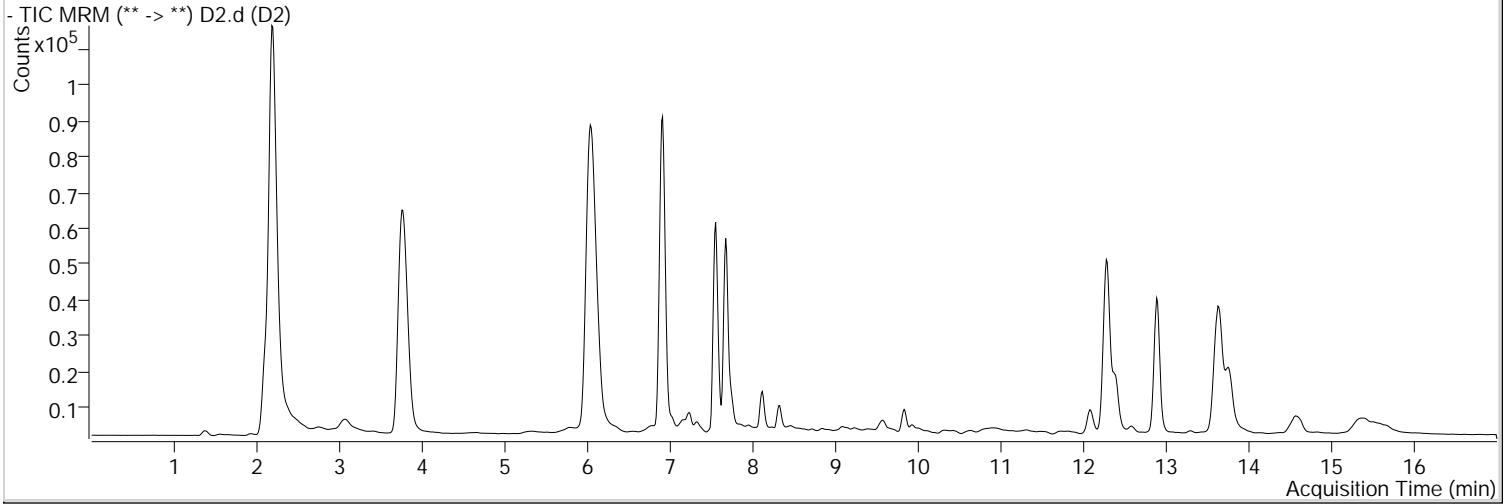

## 24-Ursolic acid

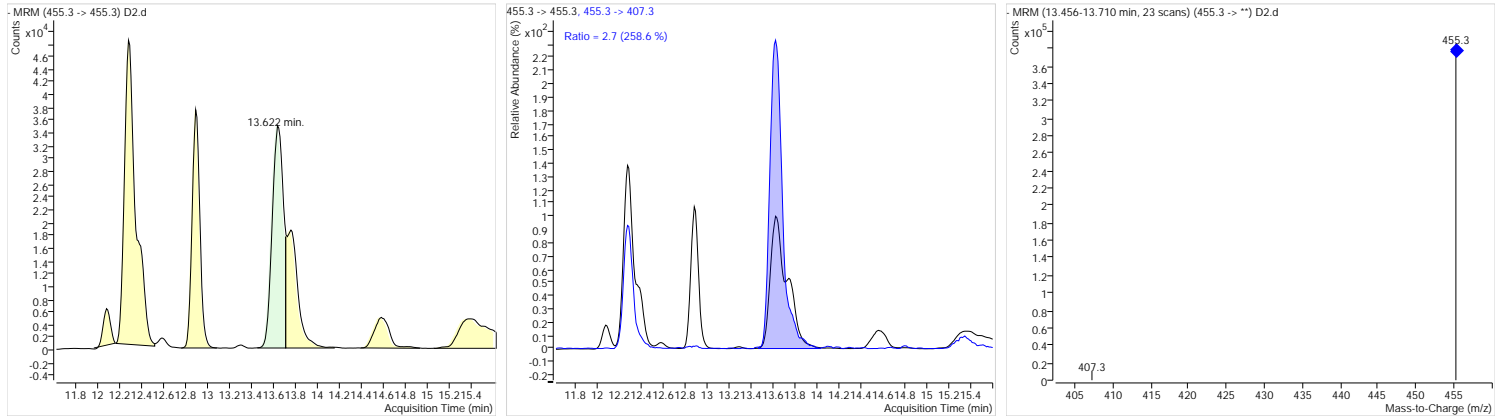

## 25-Oleanolic acid

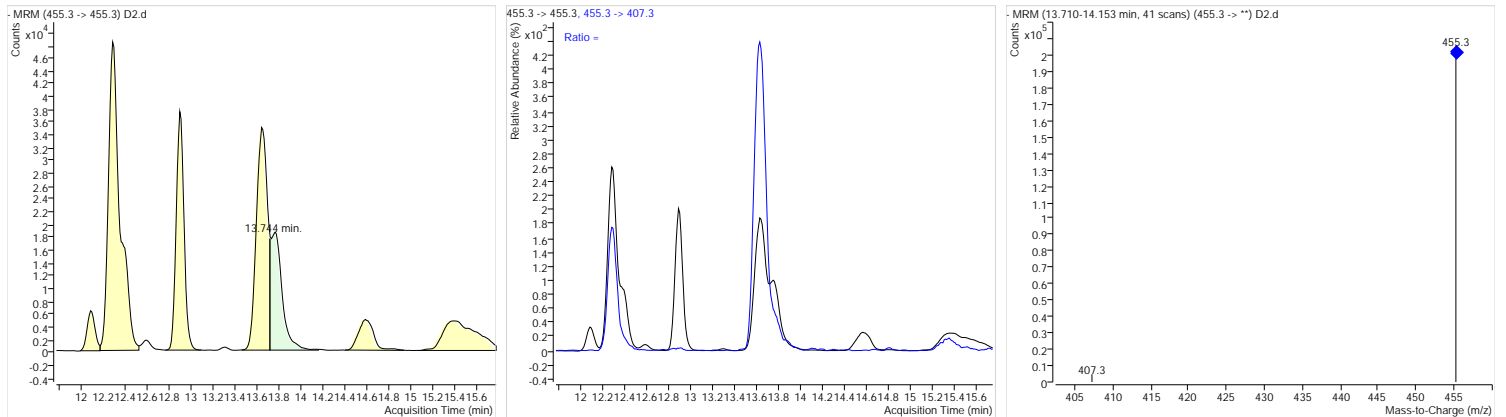

# Quantitative Analysis Complete Report



|                     |                                                                    |                      |                |
|---------------------|--------------------------------------------------------------------|----------------------|----------------|
| Batch Path          | D:\MassHunter\Data\WBR\2022\20220127-PA25\QuantResults\1.batch.bin |                      |                |
| Analysis Time       | 1/29/2022 11:06:08 AM                                              | Analyst Name         | admin-PC\admin |
| Report Time         | 1/29/2022 11:10:02 AM                                              | Reporter Name        | admin          |
| Last Calib Update   | 1/29/2022 11:06:07 AM                                              | Batch State          | Processed      |
| Quant Batch Version | B.07.01SP1                                                         | Quant Report Version | B.07.01 SP1    |

|             |                      |             |                 |
|-------------|----------------------|-------------|-----------------|
| Acq. Time   | 1/28/2022 1:54:23 AM | Data File   | D3.d            |
| Sample Type | Sample               | Sample Name | D3              |
| Dilution    | 1                    | Acq. Method | 20220127-PA25.m |

## Sample Chromatogram

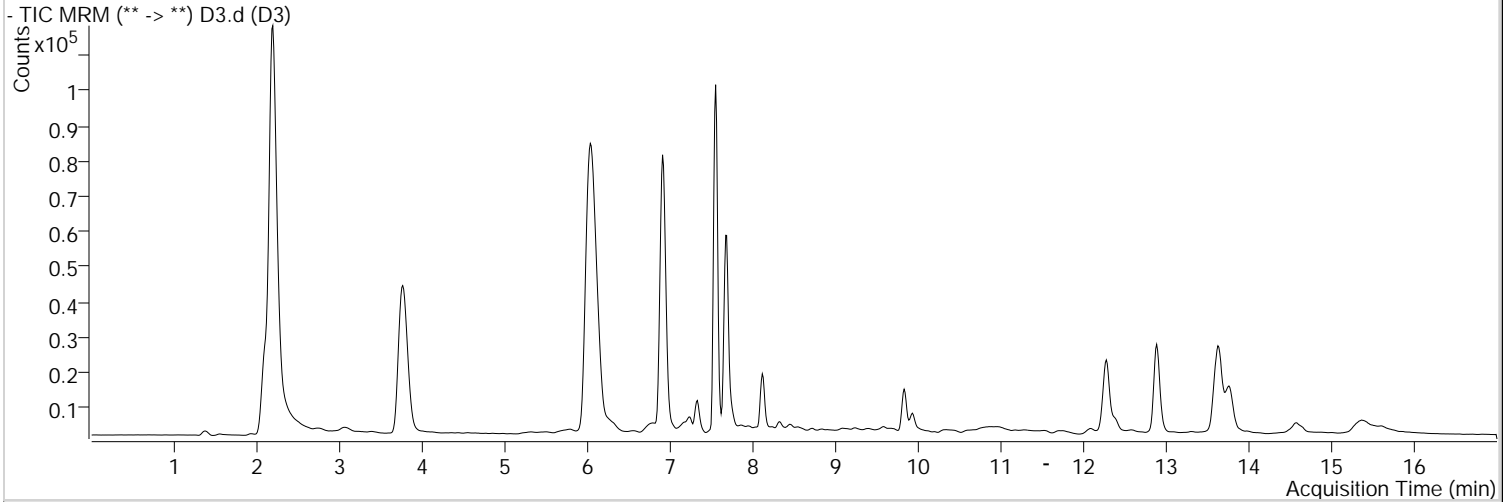

## 24-Ursolic acid

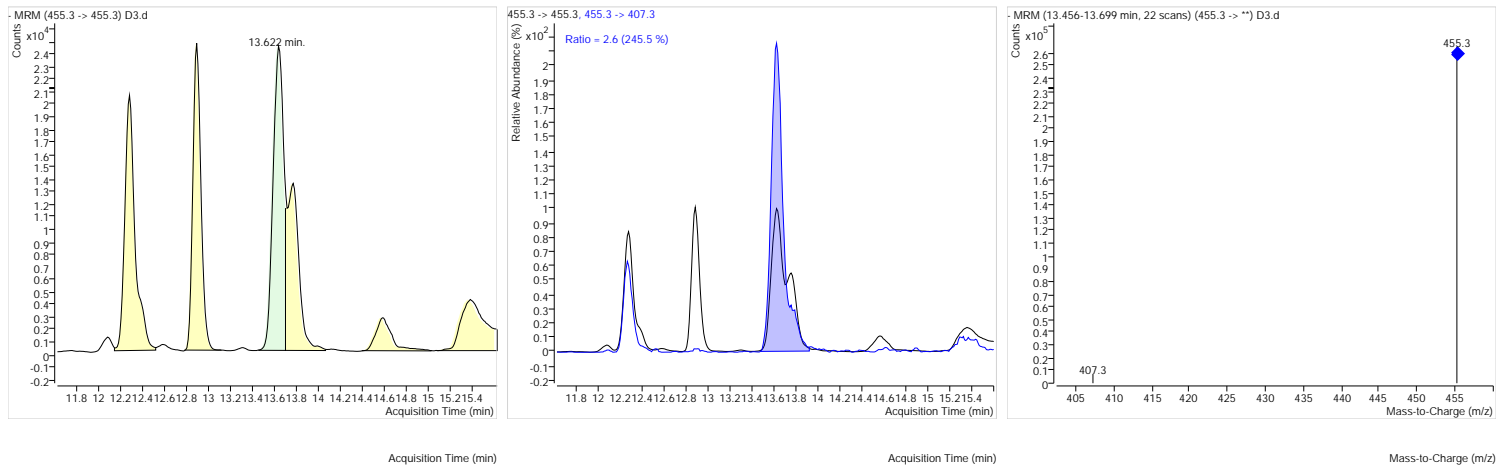

## 25-Oleanolic acid

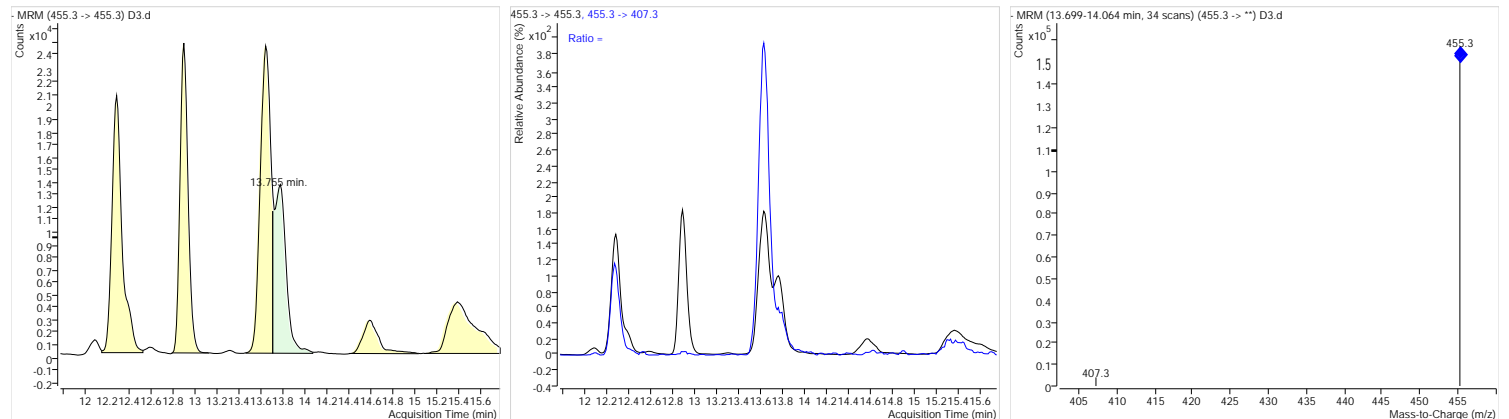

# Quantitative Analysis Complete Report

|                     |                                                                    |                      |                |
|---------------------|--------------------------------------------------------------------|----------------------|----------------|
| Batch Path          | D:\MassHunter\Data\WBR\2022\20220127-PA25\QuantResults\1.batch.bin |                      |                |
| Analysis Time       | 1/29/2022 11:06:08 AM                                              | Analyst Name         | admin-PC\admin |
| Report Time         | 1/29/2022 11:10:06 AM                                              | Reporter Name        | admin          |
| Last Calib Update   | 1/29/2022 11:06:07 AM                                              | Batch State          | Processed      |
| Quant Batch Version | B.07.01SP1                                                         | Quant Report Version | B.07.01 SP1    |

|             |                      |             |                 |
|-------------|----------------------|-------------|-----------------|
| Acq. Time   | 1/28/2022 2:12:05 AM | Data File   | D4.d            |
| Sample Type | Sample               | Sample Name | D4              |
| Dilution    | 1                    | Acq. Method | 20220127-PA25.m |

## Sample Chromatogram

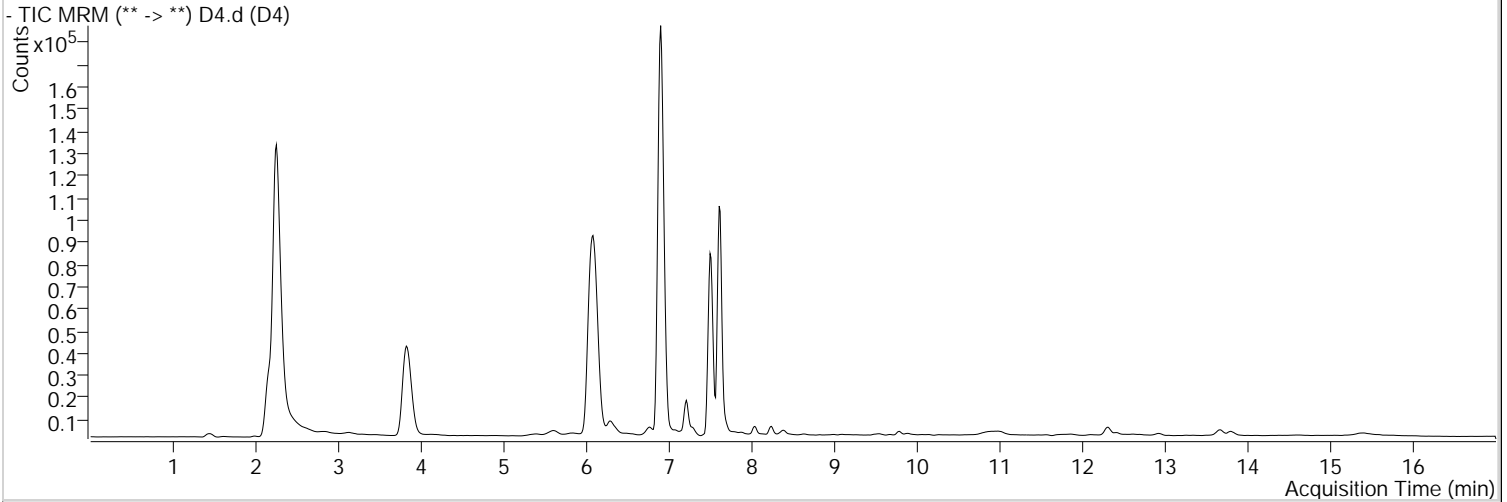

## 24-Ursolic acid

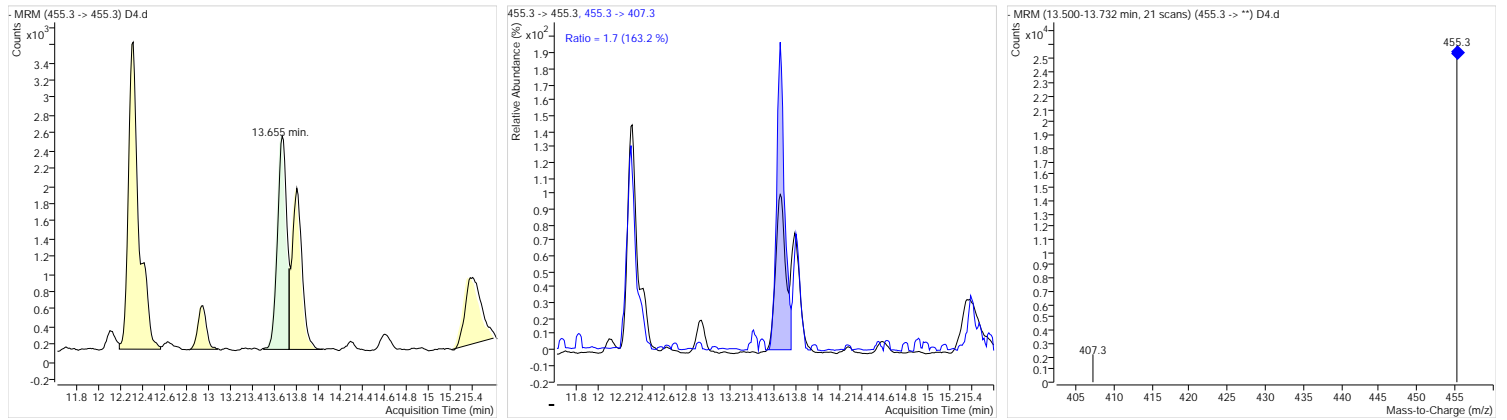

## 25-Oleanolic acid

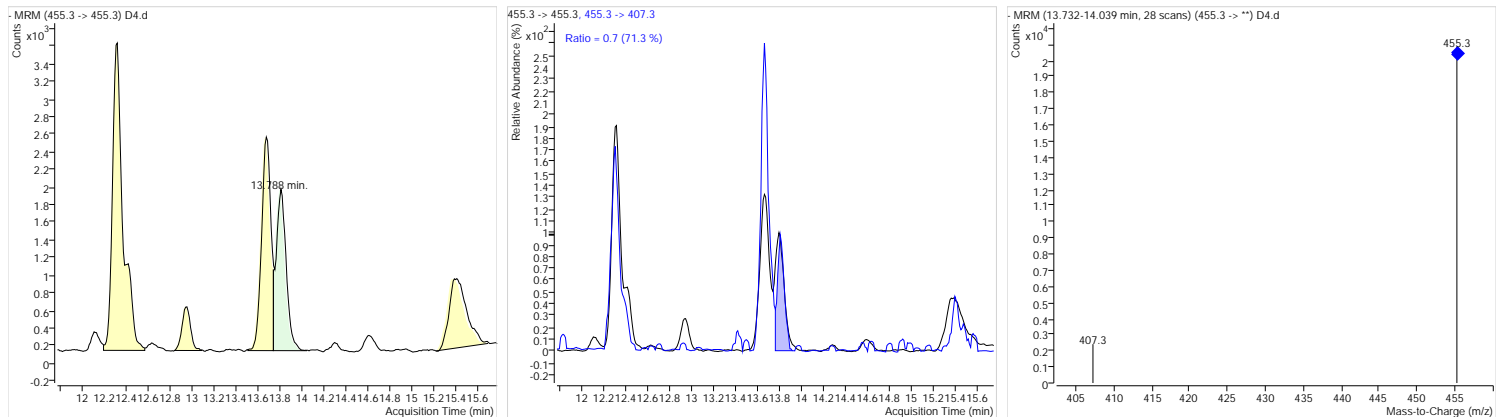

# Quantitative Analysis Complete Report

|                     |                                                                    |                      |                |
|---------------------|--------------------------------------------------------------------|----------------------|----------------|
| Batch Path          | D:\MassHunter\Data\WBR\2022\20220127-PA25\QuantResults\1.batch.bin | Analyst Name         | admin-PC\admin |
| Analysis Time       | 1/29/2022 11:06:08 AM                                              | Reporter Name        | admin          |
| Report Time         | 1/29/2022 11:10:09 AM                                              | Batch State          | Processed      |
| Last Calib Update   | 1/29/2022 11:06:07 AM                                              | Quant Report Version | B.07.01 SP1    |
| Quant Batch Version | B.07.01SP1                                                         |                      |                |

|             |                      |             |                 |
|-------------|----------------------|-------------|-----------------|
| Acq. Time   | 1/28/2022 2:29:50 AM | Data File   | D5.d            |
| Sample Type | Sample               | Sample Name | D5              |
| Dilution    | 1                    | Acq. Method | 20220127-PA25.m |

## Sample Chromatogram

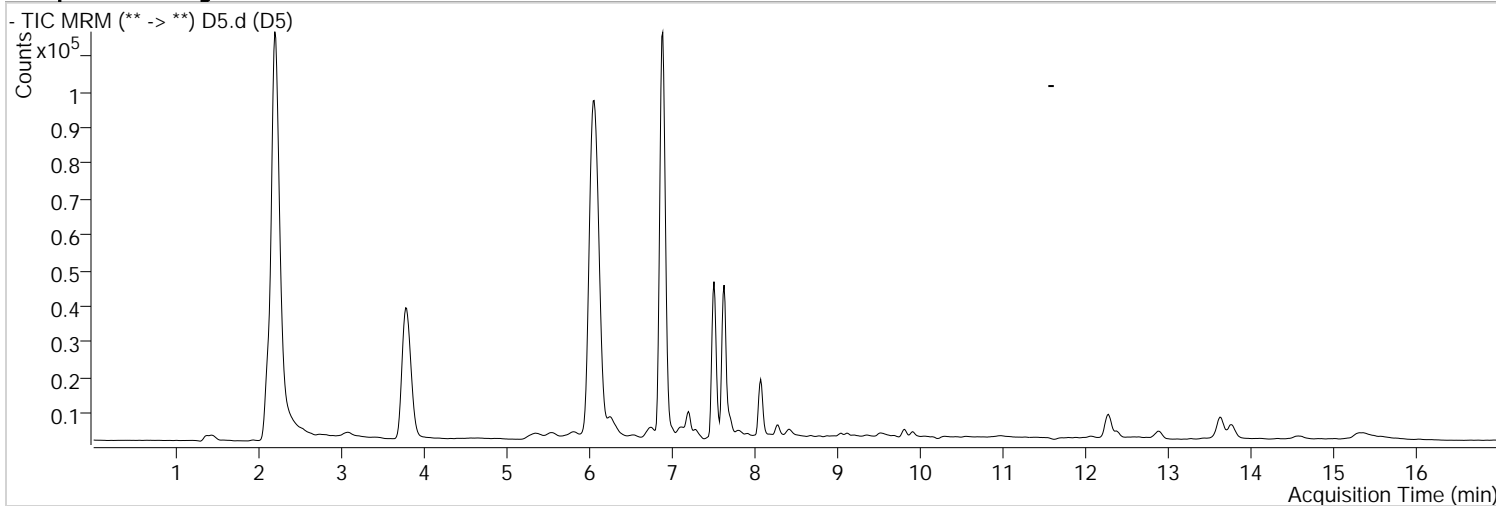

## 24-Ursolic acid

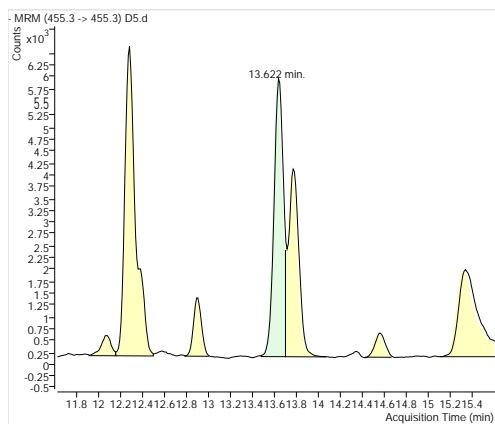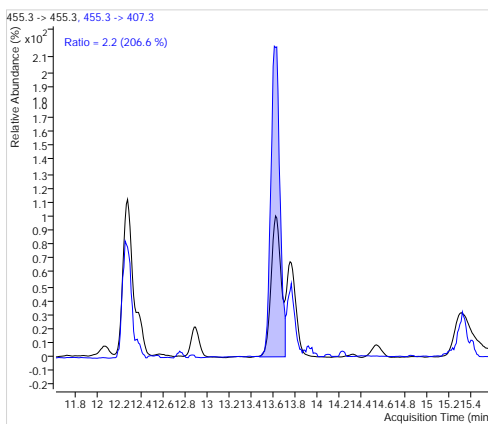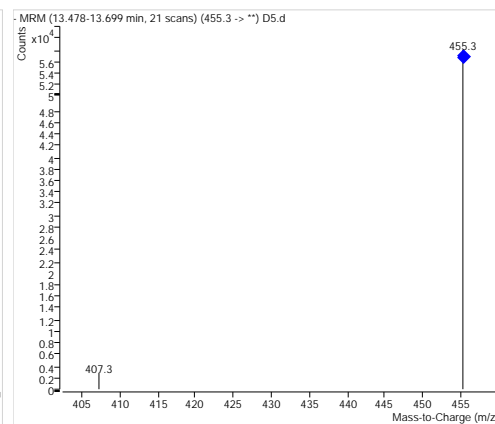

## 25-Oleanolic acid

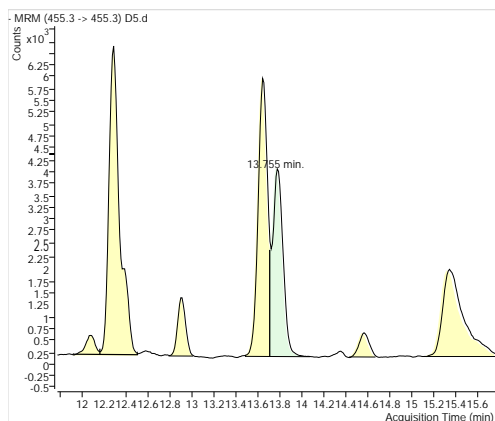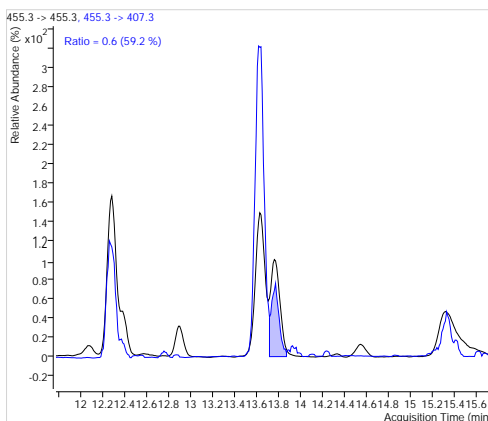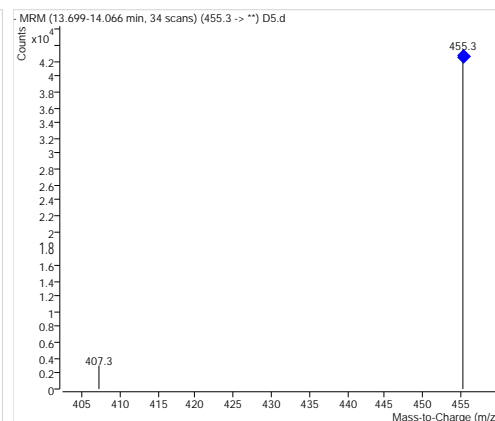

# Quantitative Analysis Complete Report

|                     |                                                                    |                      |                |
|---------------------|--------------------------------------------------------------------|----------------------|----------------|
| Batch Path          | D:\MassHunter\Data\WBR\2022\20220127-PA25\QuantResults\1.batch.bin |                      |                |
| Analysis Time       | 1/29/2022 11:06:08 AM                                              | Analyst Name         | admin-PC\admin |
| Report Time         | 1/29/2022 11:10:12 AM                                              | Reporter Name        | admin          |
| Last Calib Update   | 1/29/2022 11:06:07 AM                                              | Batch State          | Processed      |
| Quant Batch Version | B.07.01SP1                                                         | Quant Report Version | B.07.01 SP1    |

|             |                      |             |                 |
|-------------|----------------------|-------------|-----------------|
| Acq. Time   | 1/28/2022 2:47:32 AM | Data File   | D6.d            |
| Sample Type | Sample               | Sample Name | D6              |
| Dilution    | 1                    | Acq. Method | 20220127-PA25.m |

## Sample Chromatogram

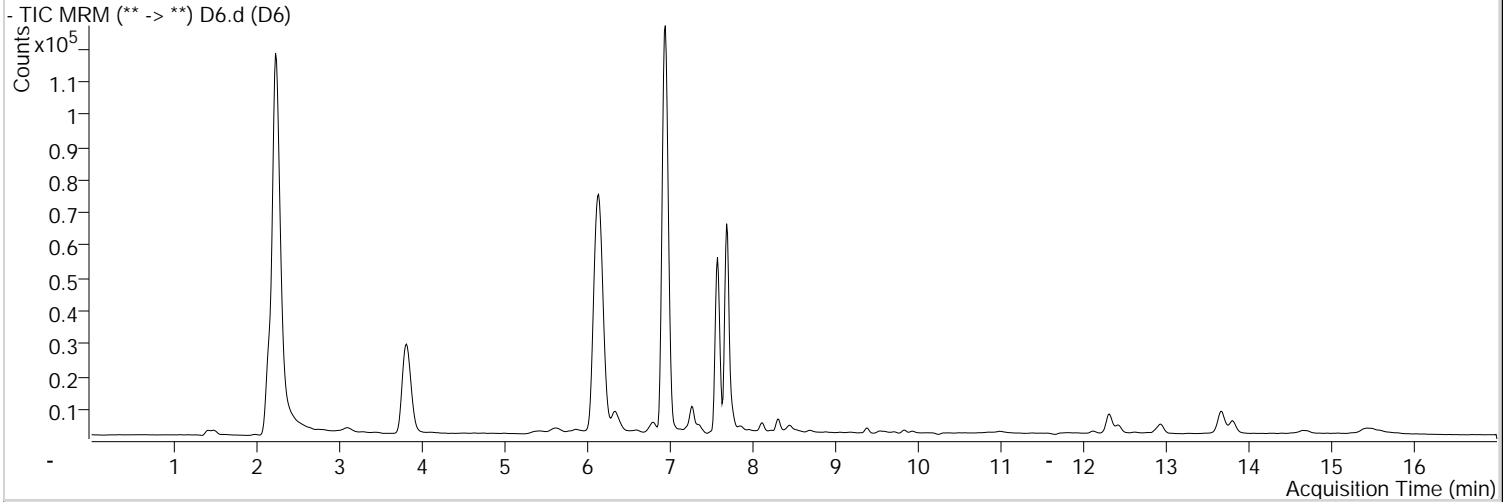

## 24-Ursolic acid

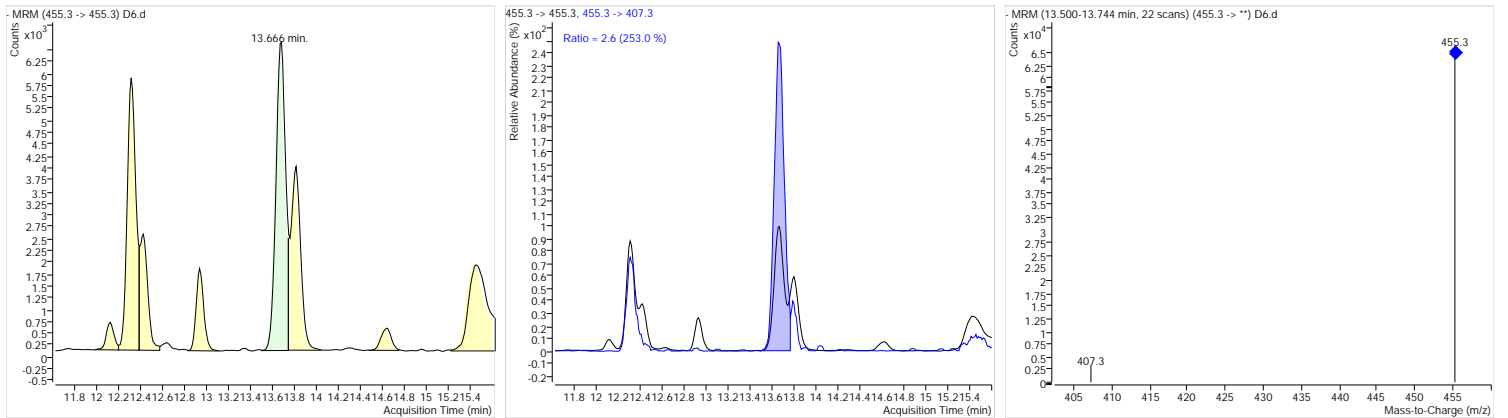

## 25-Oleanolic acid

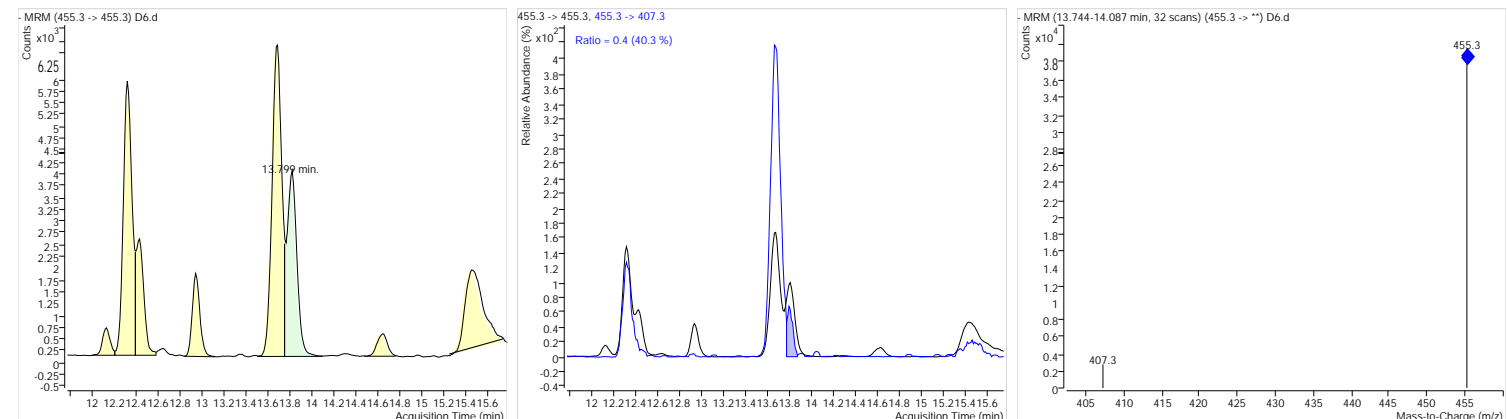

# Quantitative Analysis Complete Report

|                     |                                                                    |                      |                |
|---------------------|--------------------------------------------------------------------|----------------------|----------------|
| Batch Path          | D:\MassHunter\Data\WBR\2022\20220127-PA25\QuantResults\1.batch.bin |                      |                |
| Analysis Time       | 1/29/2022 11:06:08 AM                                              | Analyst Name         | admin-PC\admin |
| Report Time         | 1/29/2022 11:10:16 AM                                              | Reporter Name        | admin          |
| Last Calib Update   | 1/29/2022 11:06:07 AM                                              | Batch State          | Processed      |
| Quant Batch Version | B.07.01SP1                                                         | Quant Report Version | B.07.01 SP1    |

|             |                      |             |                 |
|-------------|----------------------|-------------|-----------------|
| Acq. Time   | 1/28/2022 3:05:13 AM | Data File   | D7.d            |
| Sample Type | Sample               | Sample Name | D7              |
| Dilution    | 1                    | Acq. Method | 20220127-PA25.m |

## Sample Chromatogram

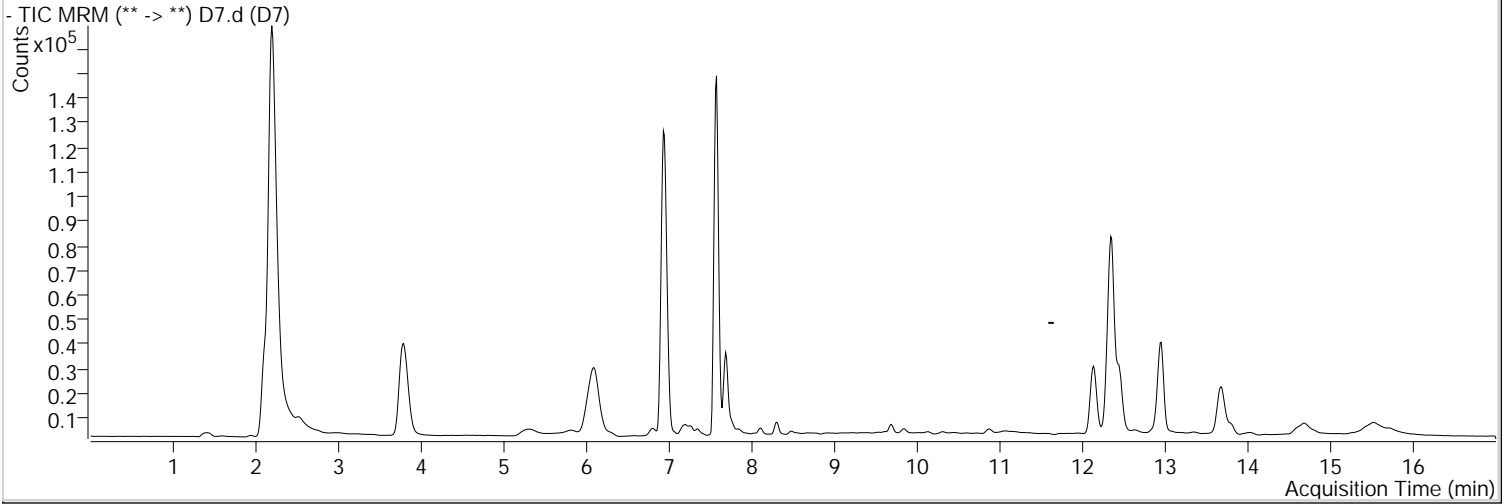

## 24-Ursolic acid

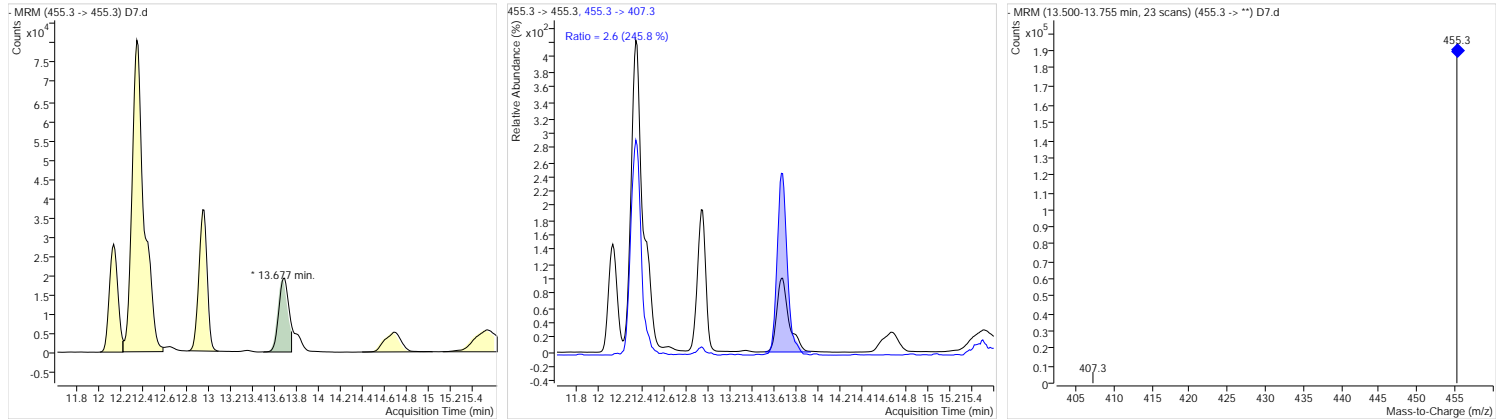

## 25-Oleanolic acid

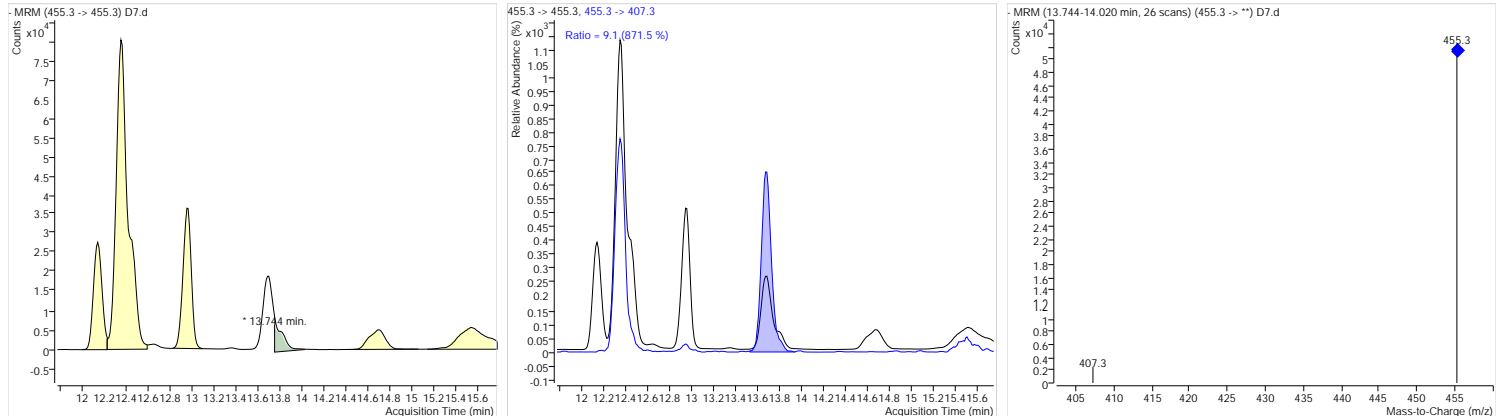

# Quantitative Analysis Complete Report

|                     |                                                                    |                      |                |
|---------------------|--------------------------------------------------------------------|----------------------|----------------|
| Batch Path          | D:\MassHunter\Data\WBR\2022\20220127-PA25\QuantResults\1.batch.bin |                      |                |
| Analysis Time       | 1/29/2022 11:06:08 AM                                              | Analyst Name         | admin-PC\admin |
| Report Time         | 1/29/2022 11:10:19 AM                                              | Reporter Name        | admin          |
| Last Calib Update   | 1/29/2022 11:06:07 AM                                              | Batch State          | Processed      |
| Quant Batch Version | B.07.01SP1                                                         | Quant Report Version | B.07.01 SP1    |

|             |                      |             |                 |
|-------------|----------------------|-------------|-----------------|
| Acq. Time   | 1/28/2022 3:22:55 AM | Data File   | D8.d            |
| Sample Type | Sample               | Sample Name | D8              |
| Dilution    | 1                    | Acq. Method | 20220127-PA25.m |

## Sample Chromatogram

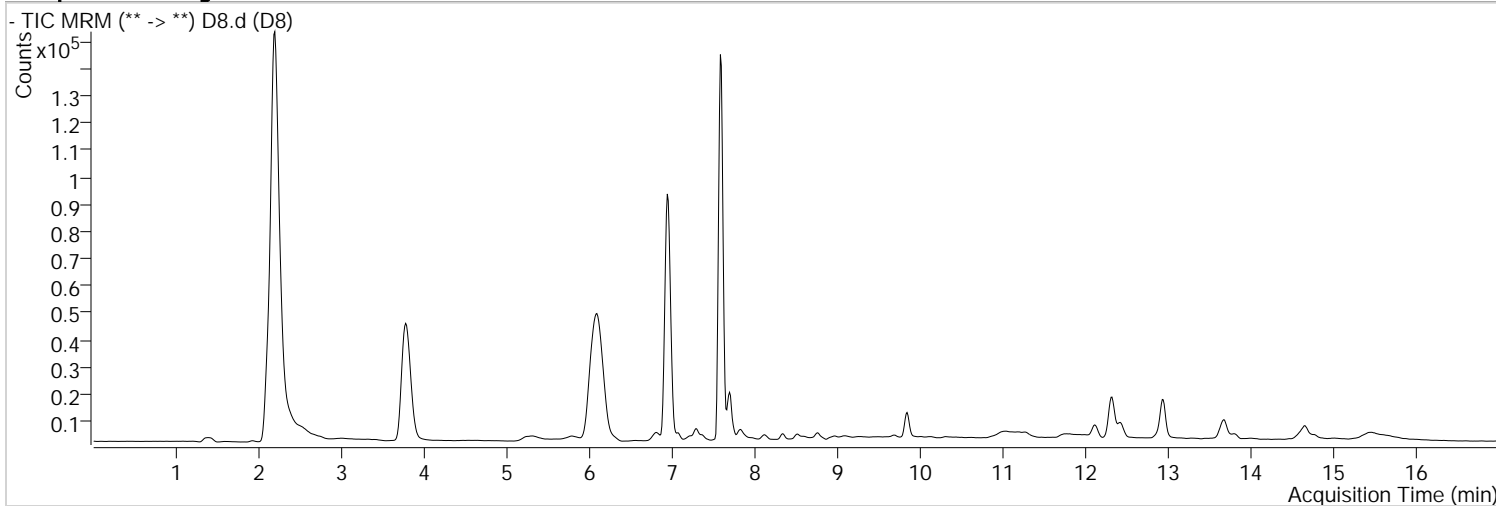

## 24-Ursolic acid

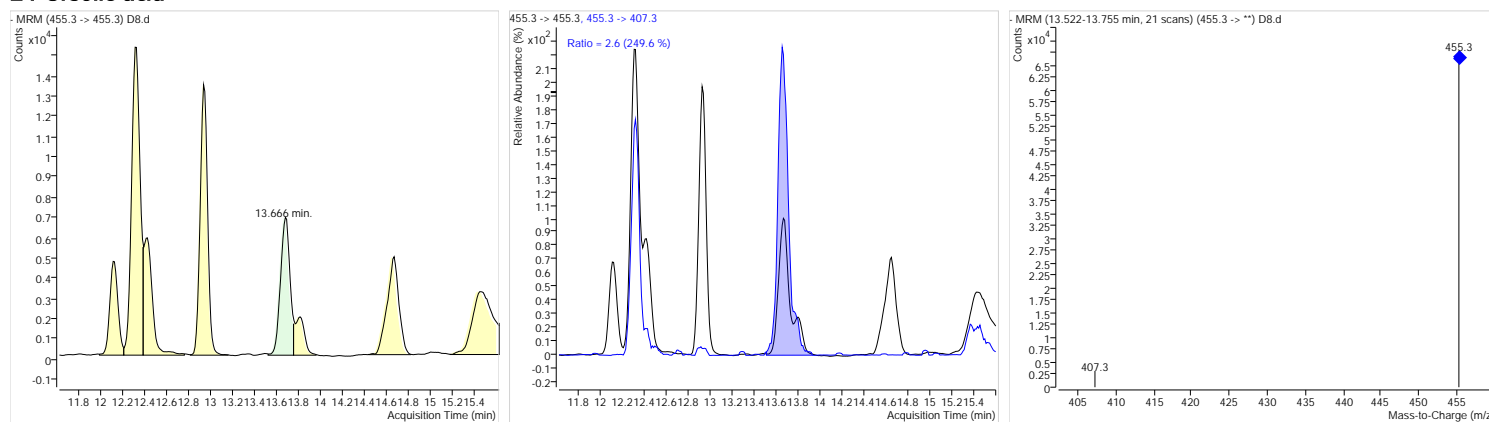

## 25-Oleanolic acid

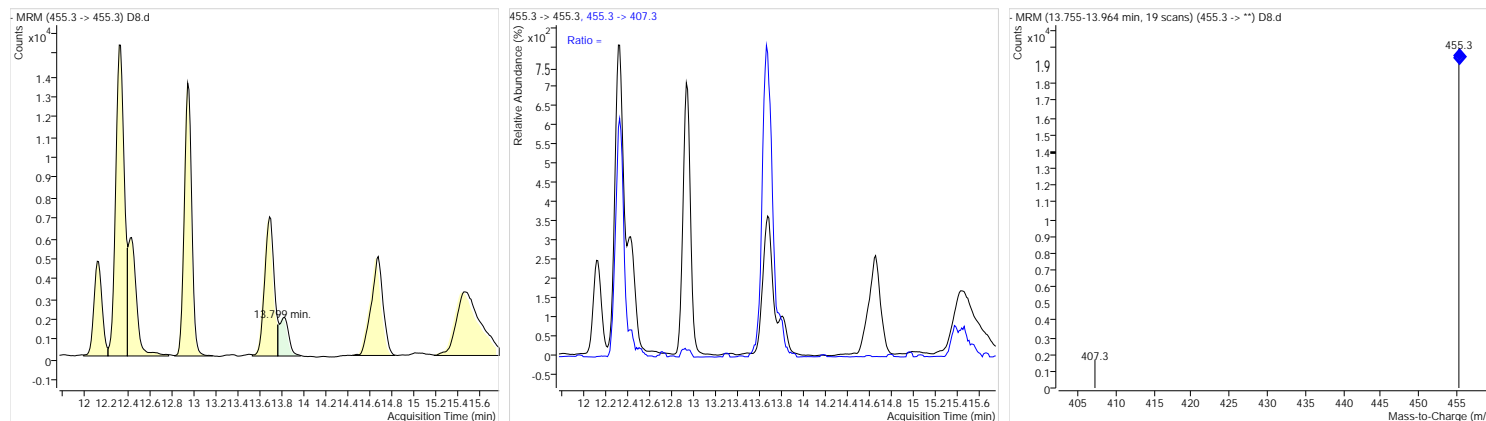





# Quantitative Analysis Complete Report

|                     |                                                                    |                      |                |
|---------------------|--------------------------------------------------------------------|----------------------|----------------|
| Batch Path          | D:\MassHunter\Data\WBR\2022\20220127-PA25\QuantResults\1.batch.bin |                      |                |
| Analysis Time       | 1/29/2022 11:06:08 AM                                              | Analyst Name         | admin-PC\admin |
| Report Time         | 1/29/2022 11:10:26 AM                                              | Reporter Name        | admin          |
| Last Calib Update   | 1/29/2022 11:06:07 AM                                              | Batch State          | Processed      |
| Quant Batch Version | B.07.01SP1                                                         | Quant Report Version | B.07.01 SP1    |

|             |                      |             |                 |
|-------------|----------------------|-------------|-----------------|
| Acq. Time   | 1/28/2022 3:58:18 AM | Data File   | D10.d           |
| Sample Type | Sample               | Sample Name | D10             |
| Dilution    | 1                    | Acq. Method | 20220127-PA25.m |

## Sample Chromatogram

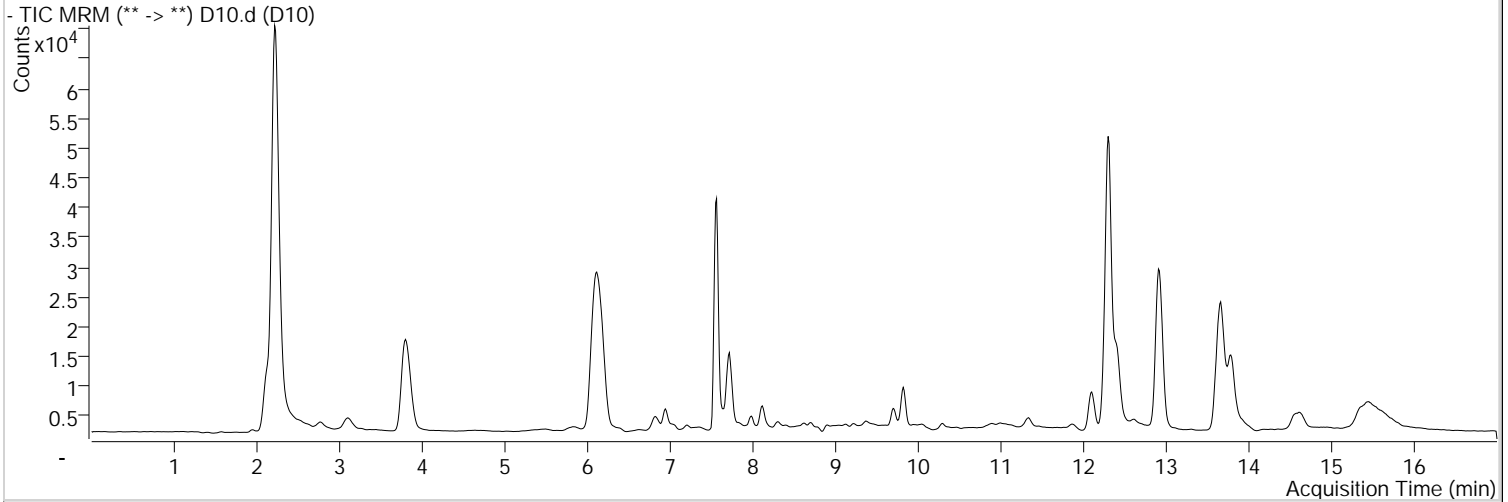

## 24-Ursolic acid

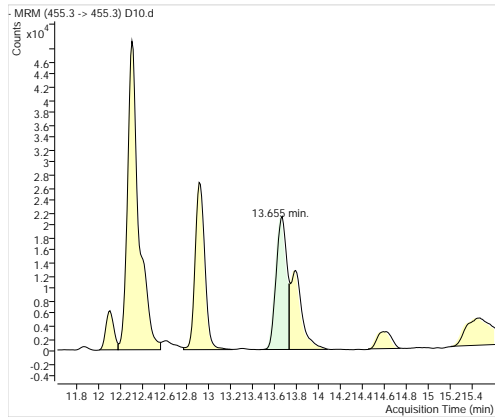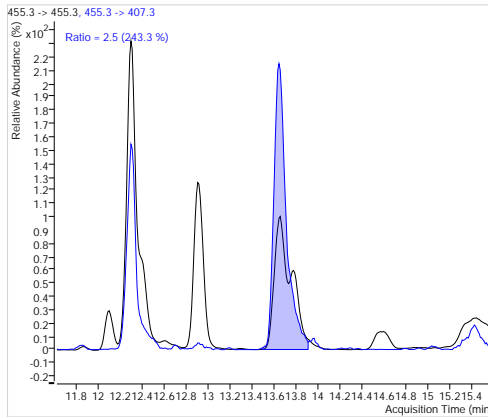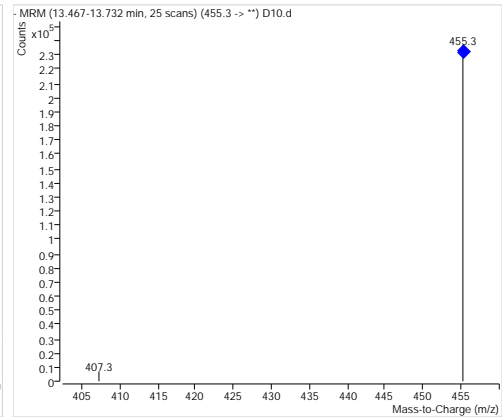

## 25-Oleanolic acid

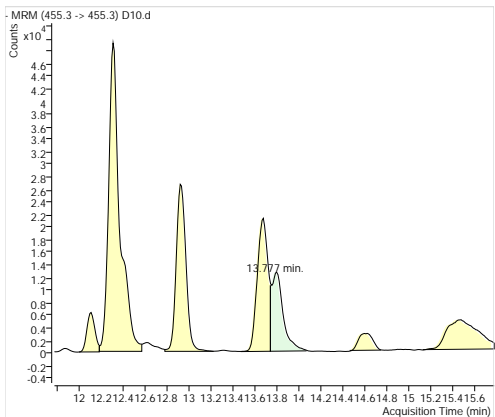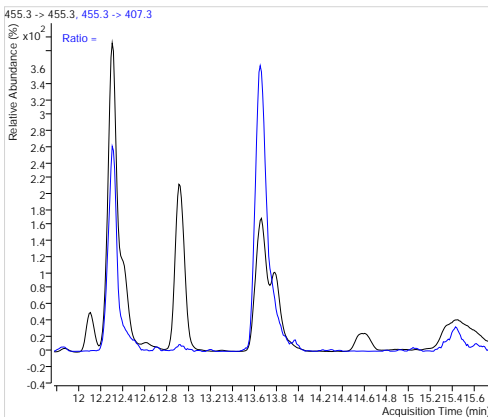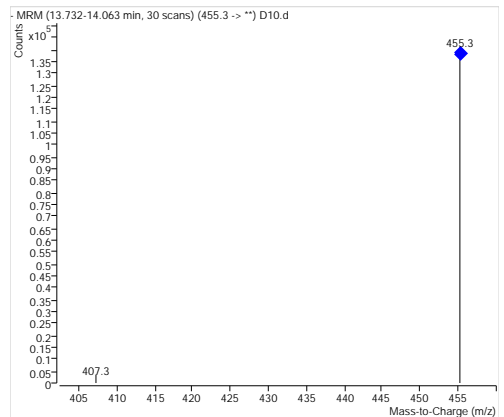

# Quantitative Analysis Complete Report

|                     |                                                                    |                      |                |
|---------------------|--------------------------------------------------------------------|----------------------|----------------|
| Batch Path          | D:\MassHunter\Data\WBR\2022\20220127-PA25\QuantResults\1.batch.bin |                      |                |
| Analysis Time       | 1/29/2022 11:06:08 AM                                              | Analyst Name         | admin-PC\admin |
| Report Time         | 1/29/2022 11:10:29 AM                                              | Reporter Name        | admin          |
| Last Calib Update   | 1/29/2022 11:06:07 AM                                              | Batch State          | Processed      |
| Quant Batch Version | B.07.01SP1                                                         | Quant Report Version | B.07.01 SP1    |

|             |                      |             |                 |
|-------------|----------------------|-------------|-----------------|
| Acq. Time   | 1/28/2022 4:15:57 AM | Data File   | D11.d           |
| Sample Type | Sample               | Sample Name | D11             |
| Dilution    | 1                    | Acq. Method | 20220127-PA25.m |

## Sample Chromatogram

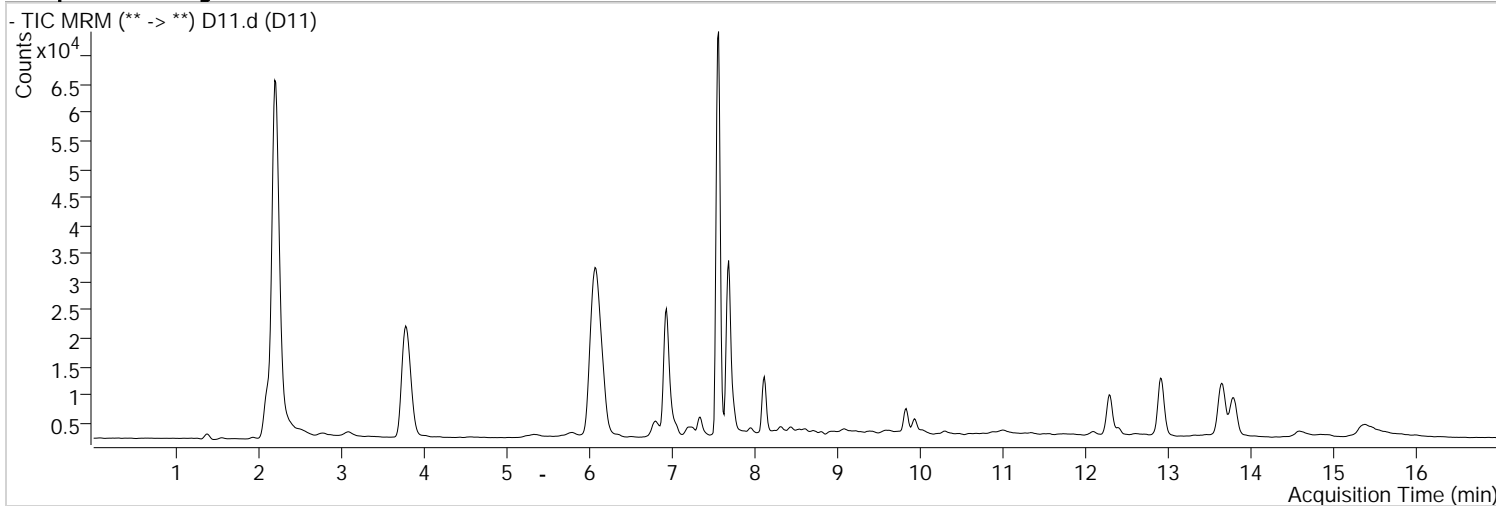

## 24-Ursolic acid

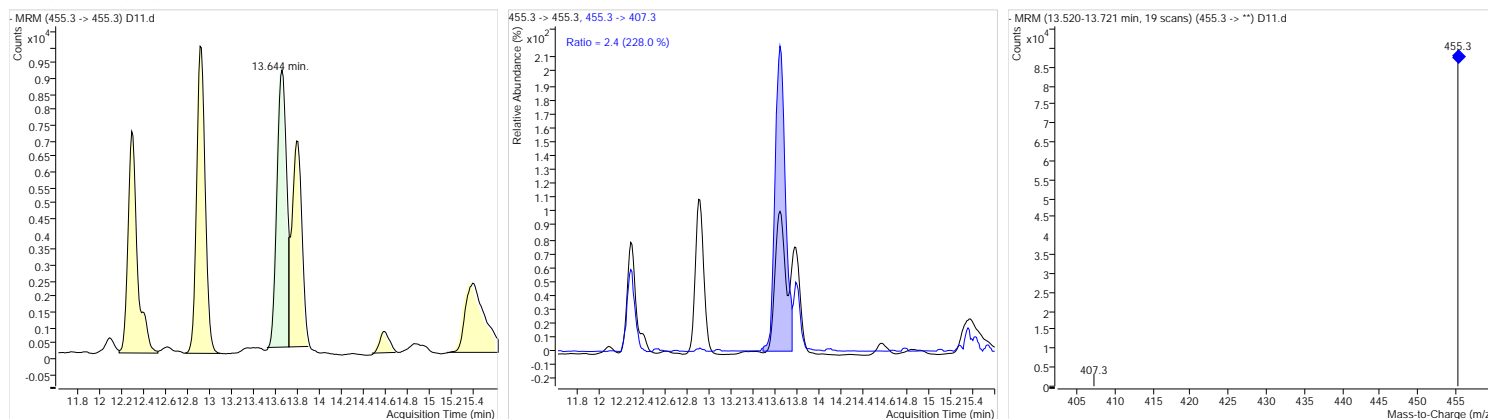

## 25-Oleanolic acid

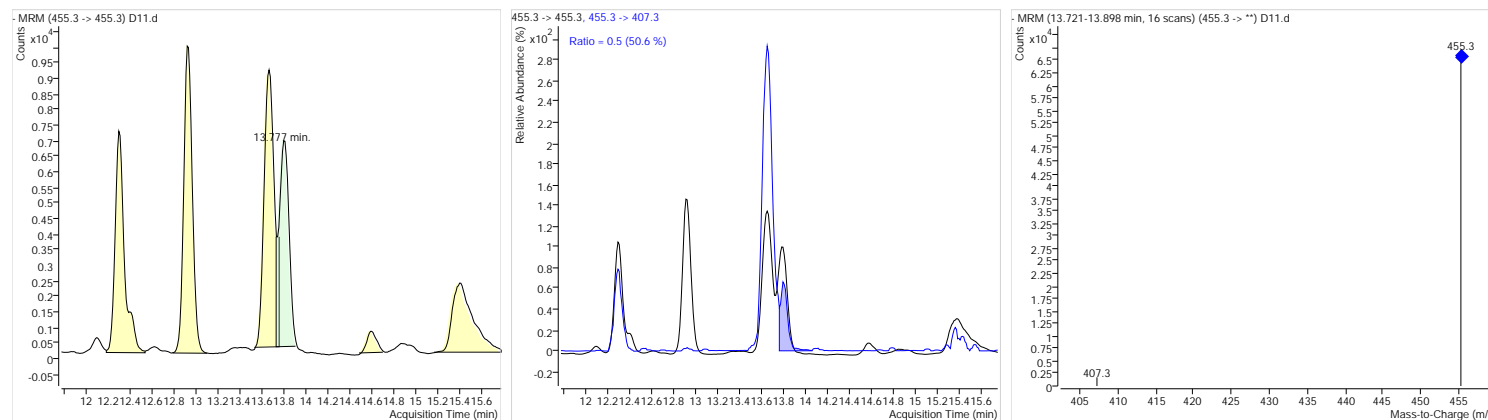

# Quantitative Analysis Complete Report

|                     |                                                                    |                      |                |
|---------------------|--------------------------------------------------------------------|----------------------|----------------|
| Batch Path          | D:\MassHunter\Data\WBR\2022\20220127-PA25\QuantResults\1.batch.bin |                      |                |
| Analysis Time       | 1/29/2022 11:06:08 AM                                              | Analyst Name         | admin-PC\admin |
| Report Time         | 1/29/2022 11:10:33 AM                                              | Reporter Name        | admin          |
| Last Calib Update   | 1/29/2022 11:06:07 AM                                              | Batch State          | Processed      |
| Quant Batch Version | B.07.01SP1                                                         | Quant Report Version | B.07.01 SP1    |

|             |                      |             |                 |
|-------------|----------------------|-------------|-----------------|
| Acq. Time   | 1/28/2022 4:33:38 AM | Data File   | D12.d           |
| Sample Type | Sample               | Sample Name | D12             |
| Dilution    | 1                    | Acq. Method | 20220127-PA25.m |

## Sample Chromatogram

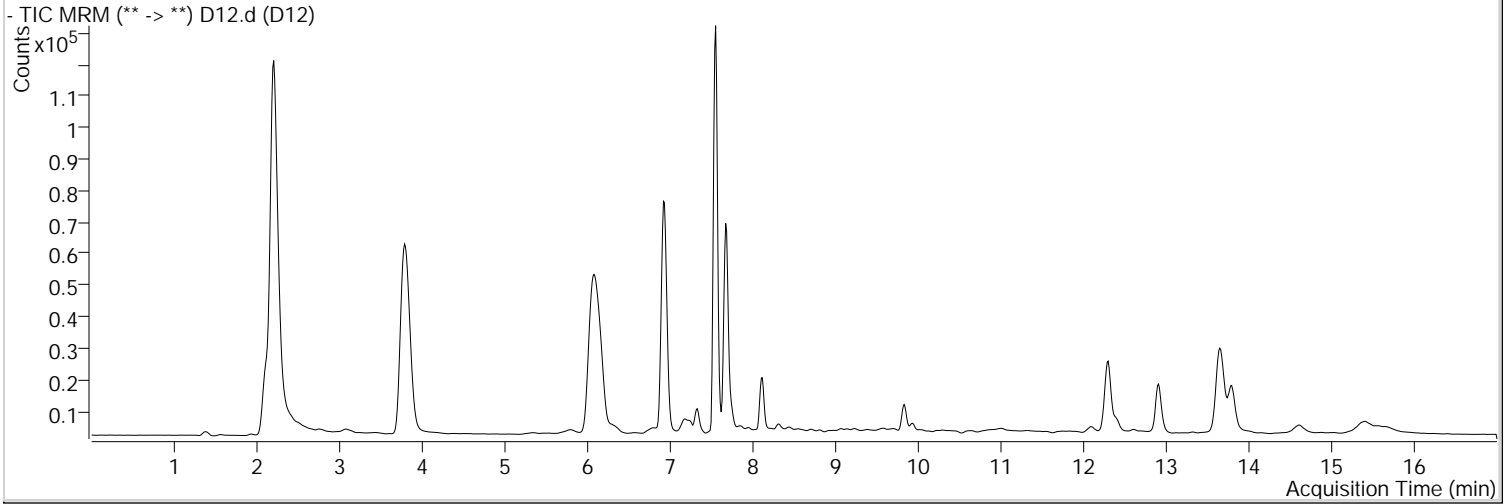

## 24-Ursolic acid

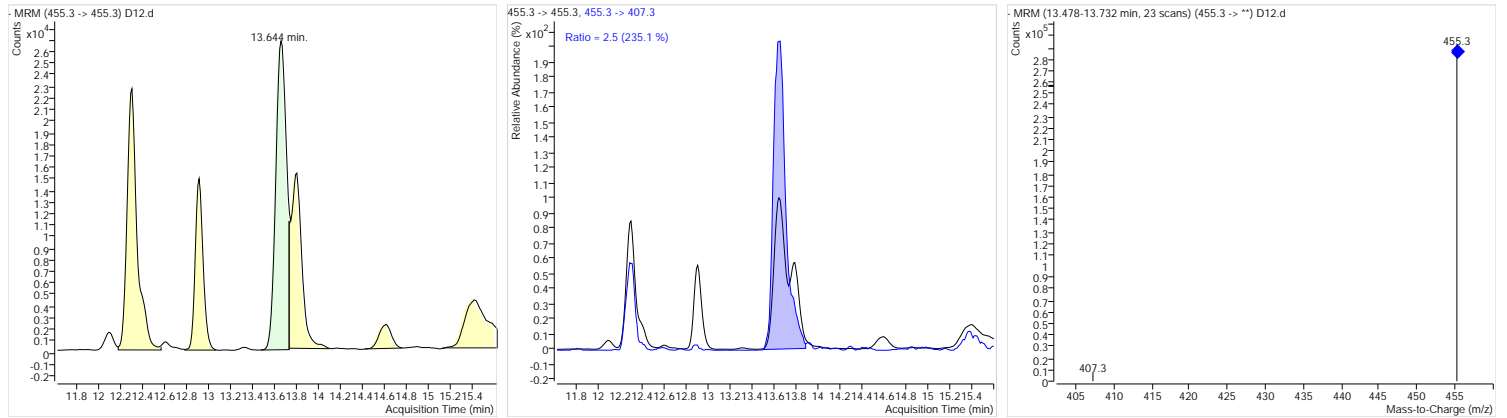

## 25-Oleanolic acid

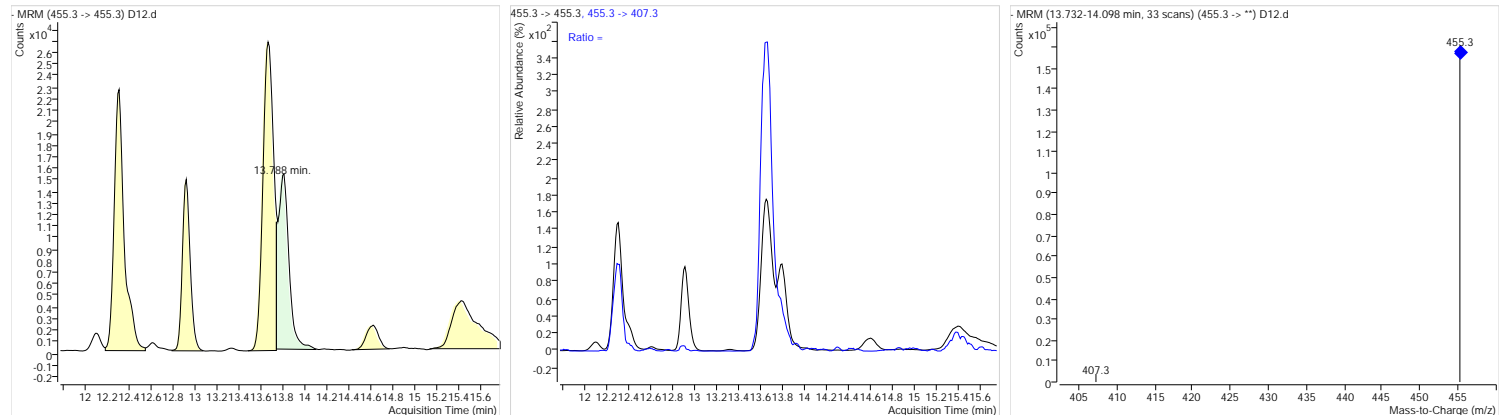

# Quantitative Analysis Complete Report

|                            |                                                                    |                             |                |
|----------------------------|--------------------------------------------------------------------|-----------------------------|----------------|
| <b>Batch Path</b>          | D:\MassHunter\Data\WBR\2022\20220127-PA25\QuantResults\1.batch.bin | <b>Analyst Name</b>         | admin-PC\admin |
| <b>Analysis Time</b>       | 1/29/2022 11:06:08 AM                                              | <b>Reporter Name</b>        | admin          |
| <b>Report Time</b>         | 1/29/2022 11:10:36 AM                                              | <b>Batch State</b>          | Processed      |
| <b>Last Calib Update</b>   | 1/29/2022 11:06:07 AM                                              | <b>Quant Report Version</b> | B.07.01 SP1    |
| <b>Quant Batch Version</b> | B.07.01SP1                                                         |                             |                |

|                    |                      |                    |                 |
|--------------------|----------------------|--------------------|-----------------|
| <b>Acq. Time</b>   | 1/28/2022 4:51:19 AM | <b>Data File</b>   | D13.d           |
| <b>Sample Type</b> | Sample               | <b>Sample Name</b> | D13             |
| <b>Dilution</b>    | 1                    | <b>Acq. Method</b> | 20220127-PA25.m |

## Sample Chromatogram

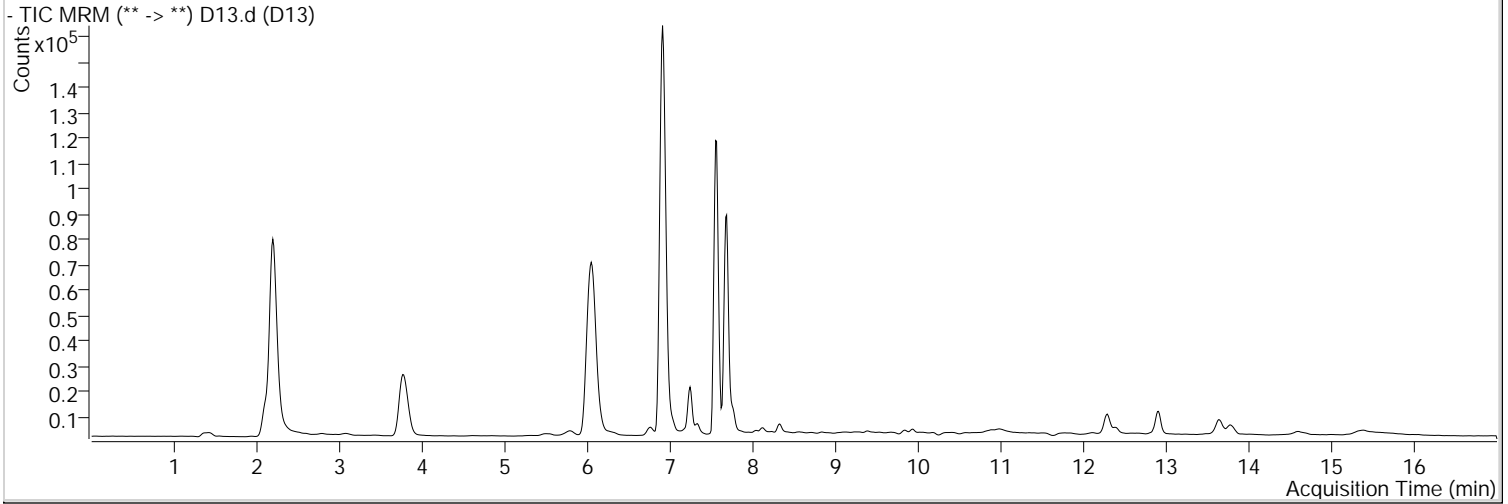

## 24-Ursolic acid

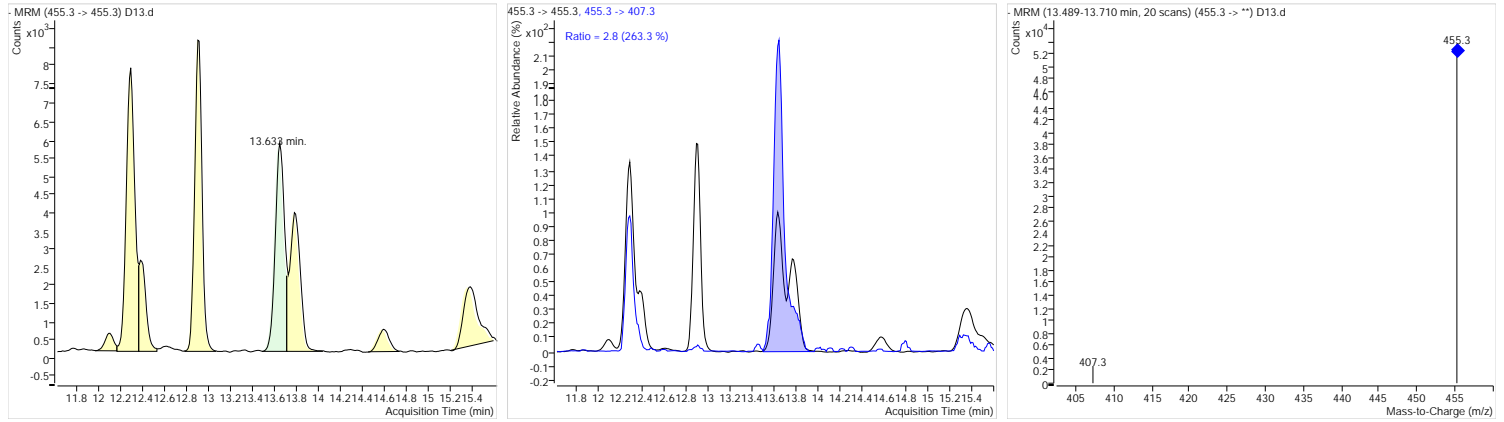

## 25-Oleanolic acid

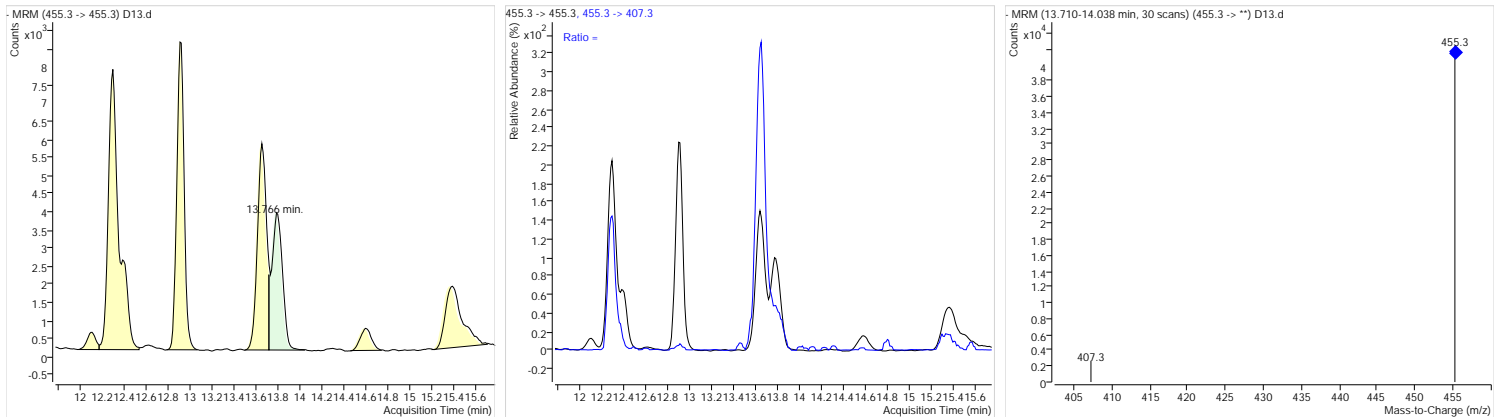

Supplement: SP.pdf [file SP.pdf]
